# Supplementary material for: Using patient-derived organoids to predict locally advanced or metastatic lung cancer tumor response: A real-world study
Source: PubMed Central journal article supplement — Cell Rep Med. 2023 Jan 18;4(2):100911. doi: 10.1016/j.xcrm.2022.100911 (PMC9975107; doi:10.1016/j.xcrm.2022.100911), 2023-01-18
Supplement: mmc1.pdf [file mmc1.pdf]

**Cell Reports Medicine, Volume 4**

**Supplemental information**

**Using patient-derived organoids to predict  
locally advanced or metastatic lung cancer  
tumor response: A real-world study**

**Han-Min Wang, Chan-Yuan Zhang, Kai-Cheng Peng, Ze-Xin Chen, Jun-Wei Su, Yu-Fa Li, Wen-Feng Li, Qing-Yun Gao, Shi-Ling Zhang, Yu-Qing Chen, Qing Zhou, Cong Xu, Chong-Rui Xu, Zhen Wang, Jian Su, Hong-Hong Yan, Xu-Chao Zhang, Hua-Jun Chen, Yi-Long Wu, and Jin-Ji Yang**

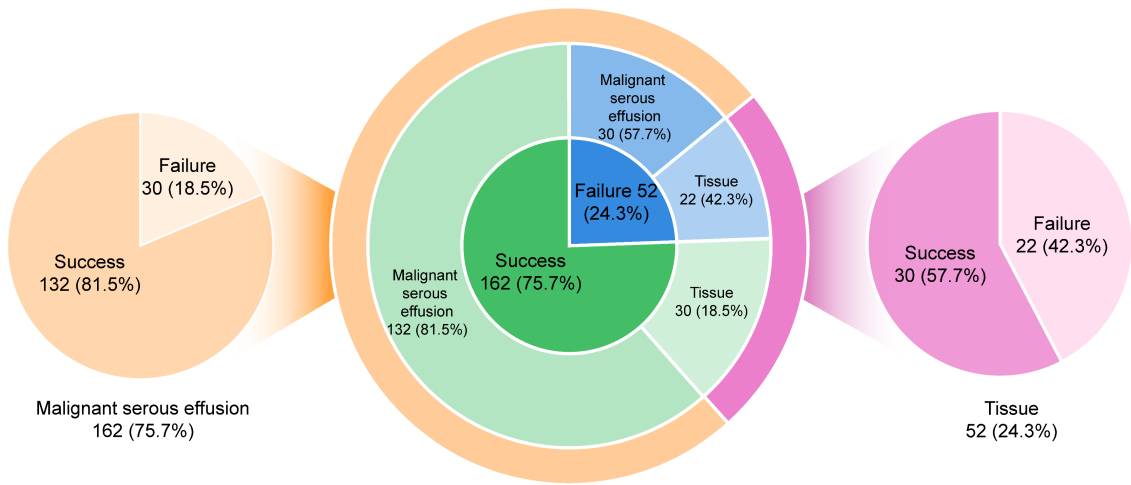

**Figure S1. The success rate of LCO cultures in this study. Related to Figure 1A**

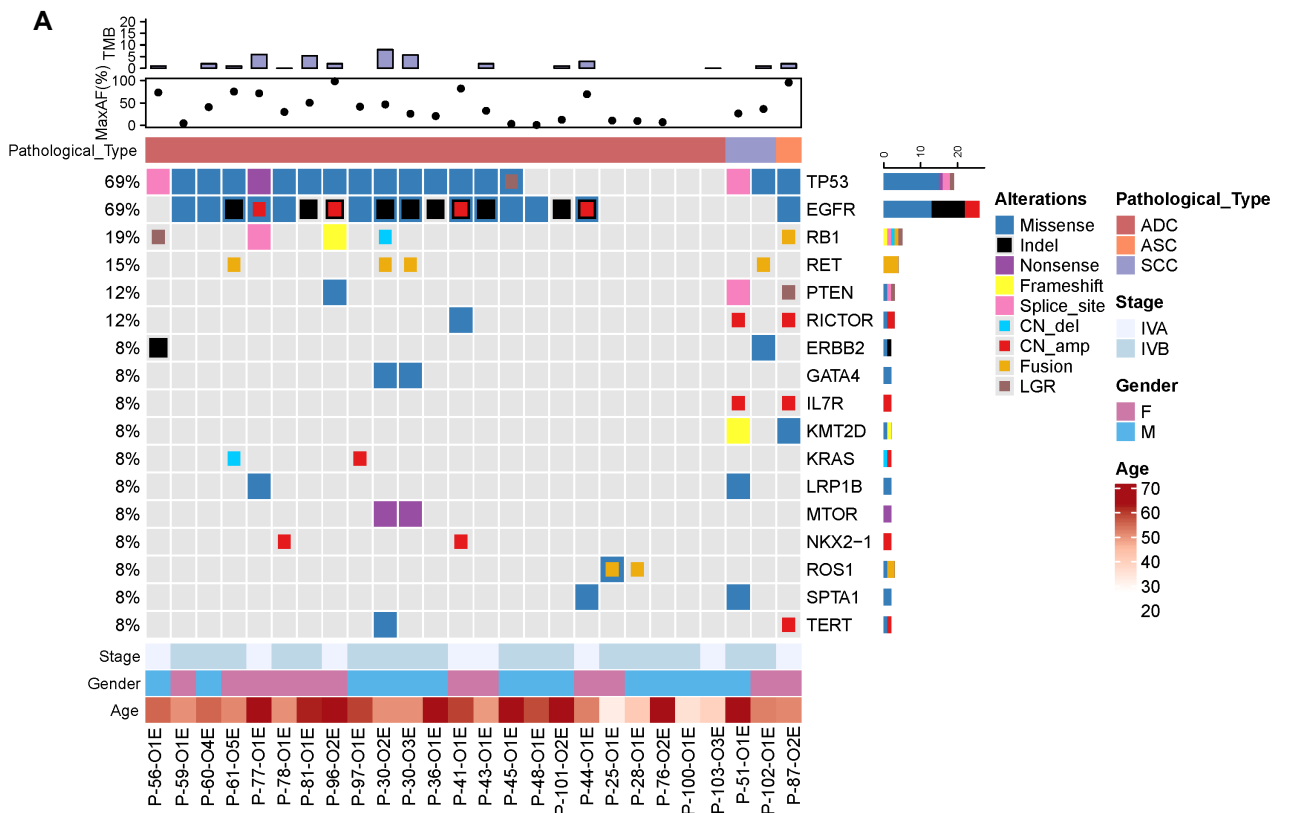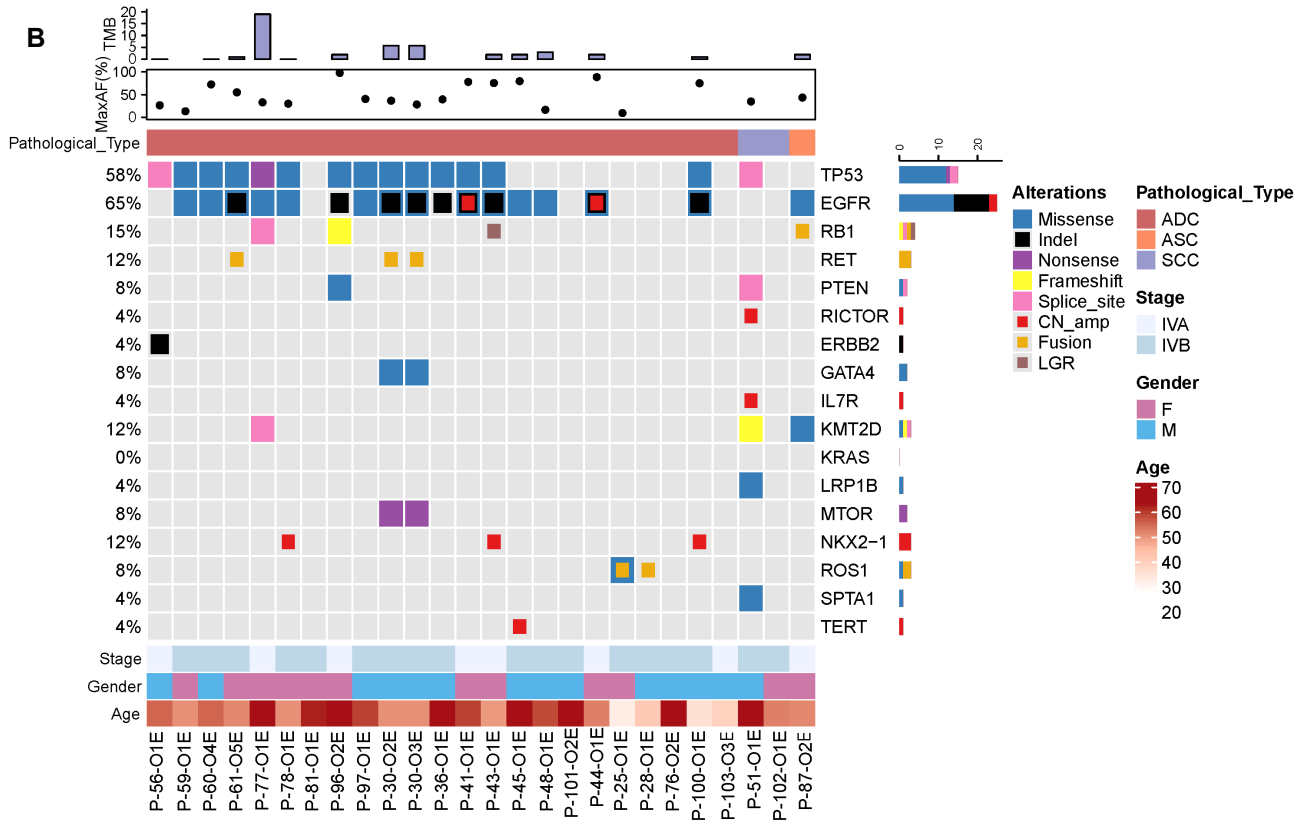

**Figure S2. Genomic profiling of LCO samples. Related to Figure 2A**

(A). Somatic alterations MSE samples. (B). Somatic alterations detected from MSE-derived LCO samples.

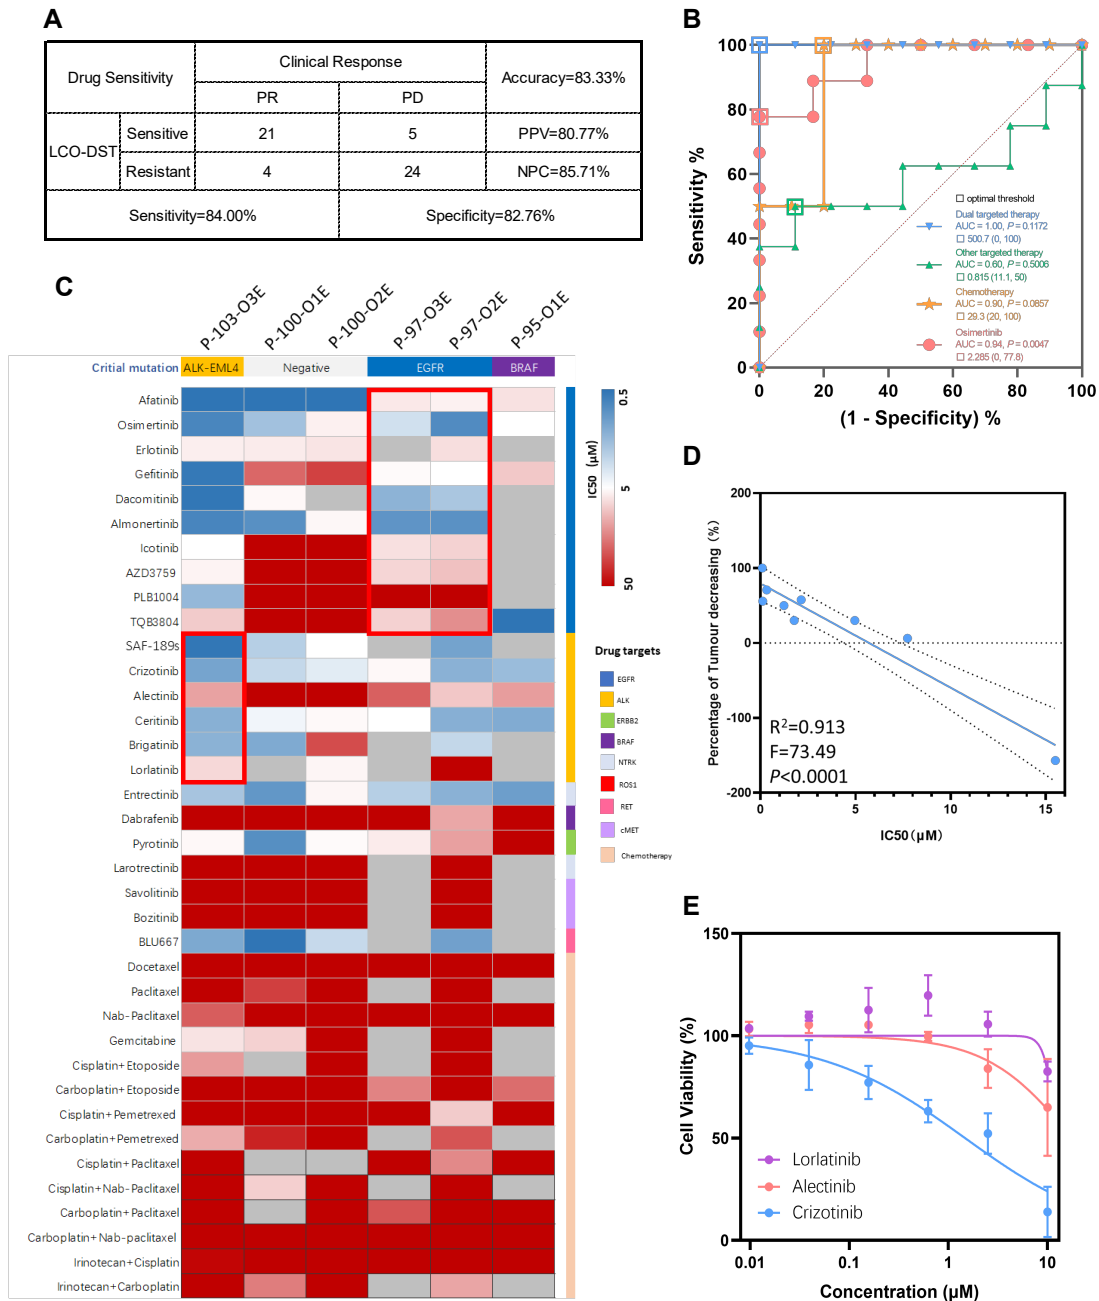

**Figure S3. Correlation between IC<sub>50</sub>s of targeted drugs and tumor cell reduction rates. Related to Figure 3** (A). The concordance for drug sensitivity between clinical response and LCO samples. (B). Receiver operating characteristic (ROC) analysis of osimertinib, chemotherapy, dual-targeted therapy, and other targeted therapy groups LCO drug tests (C). Heatmap of LCO-DST IC<sub>50</sub> of P-103, P-100, P-97, and P-95. (D). Correlation between IC<sub>50</sub> of osimertinib and the percentage of tumor shrinkage. (E). Dose-effect curves of alectinib, lorlatinib, and crizotinib of LCOs derived from P-63.

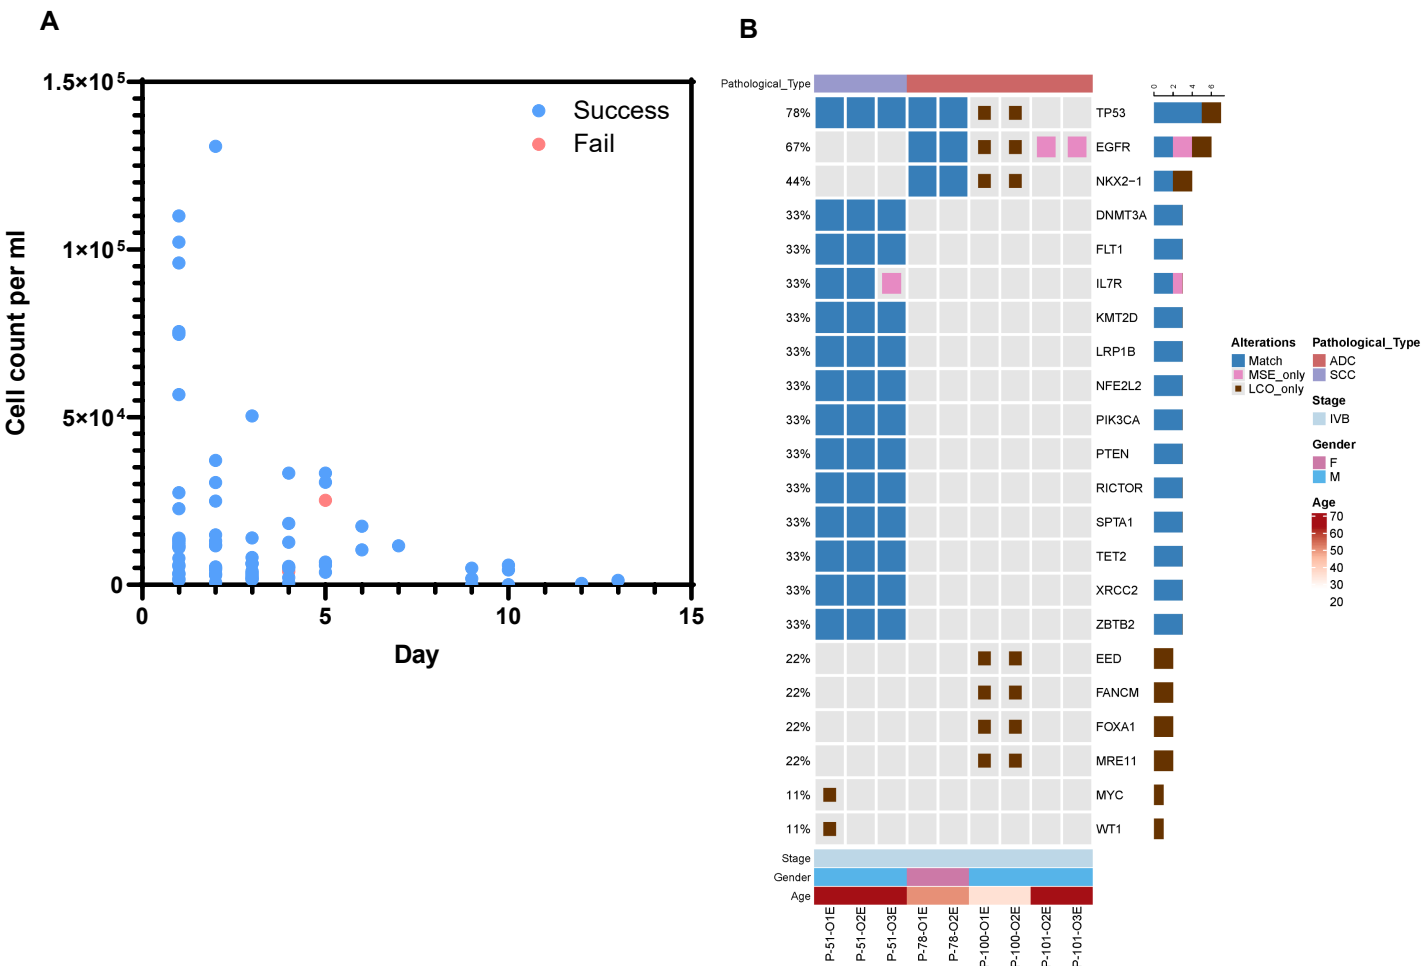

**Figure S4. Dynamic evolution of cell numbers and genetic alterations in LCOs and MSEs. Related to Figure 4A**  
 (A). Cell density of MSEs in different sampling times. (B). Somatic alterations detected from LCOs at different sampling times in four patients.

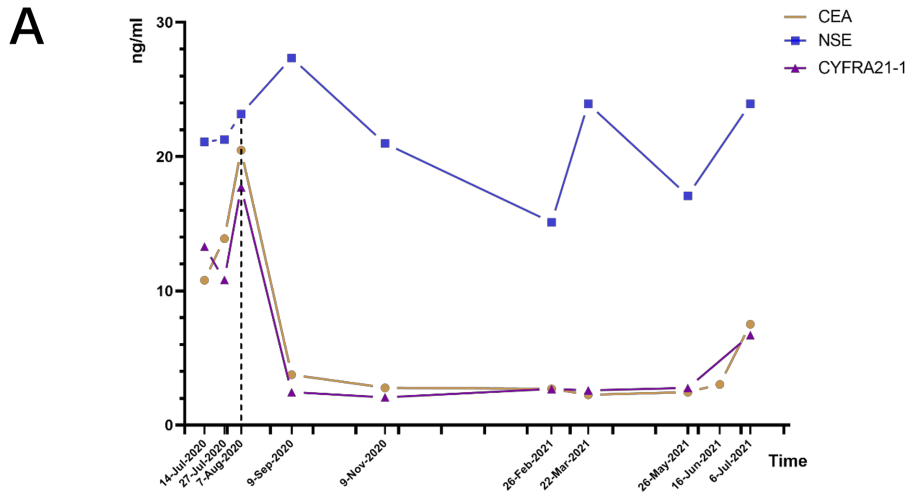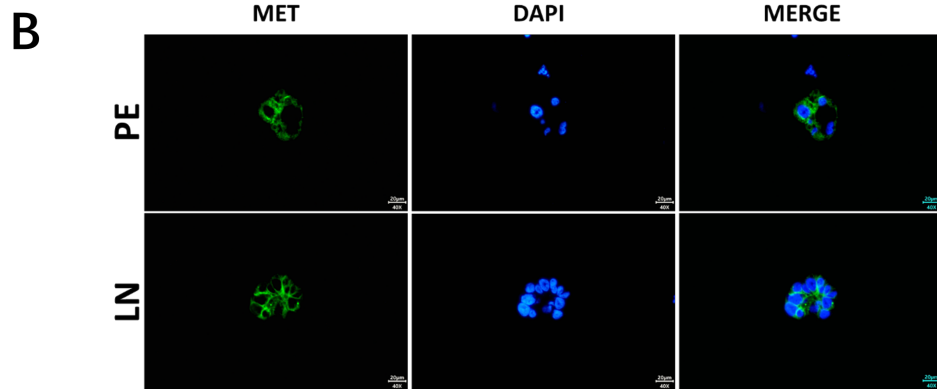

**Figure S5. Evaluation of tumor markers and baseline immunofluorescence of P-60. Related to Figure 5**  
 (A). Alterations of CEA, CYF21-1, and NSE of P-60. (B). Immunofluorescence staining of MET and DAPI of LCOs derived from pericardial effusion and lymph node of P-60. Scale bar, 20  $\mu$ m.

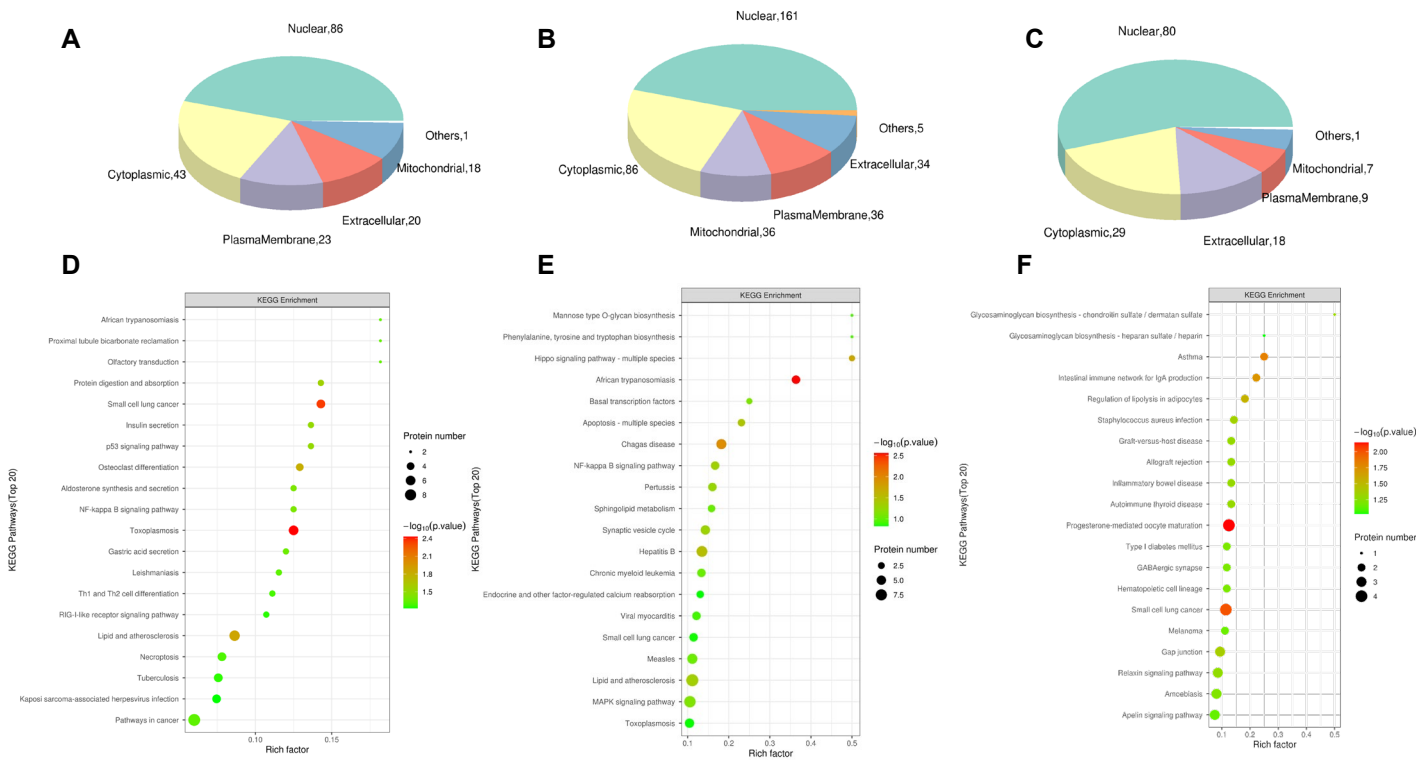

**Figure S6. Pie chart showing cell locations and scatter plot of KEGG enrichments of differentially expressed proteins (DEPs) from different comparison groups. Related to Figure 6**

(A). Cell locations of the osimertinib vs. control group. (B). Cell locations of the BLU-667 vs. control group. (C). Cell locations of the combo vs. control group. (D). KEGG enrichment of the osimertinib vs. control group. (E). KEGG enrichment of the BLU-667 vs. control group. (F). KEGG enrichment of the combo vs. control group.

**Table S1. The list of lung cancer samples used for successful establishment of patient-derived organoids. Related to Figure 1A.**

| Case | Organoid ID | Gender | Age | ECOG     |       | Pathology diagnosis | Site of sampling           | Driver mutation detected by routine genetic testing or FISH | Treatment lines | Therapies after acquiring tumor specimens to generate organoids | Organoid IHC                  |
|------|-------------|--------|-----|----------|-------|---------------------|----------------------------|-------------------------------------------------------------|-----------------|-----------------------------------------------------------------|-------------------------------|
|      |             |        |     | PS score | Stage |                     |                            |                                                             |                 |                                                                 |                               |
| P-1  | P-1-O1T     | F      | 55  | 1        | IVB   | ADC                 | Pleural tissue             | NA                                                          | 4               | NA                                                              | NA                            |
| P-2  | P-2-O1T     | M      | 51  | 1        | IVB   | ADC                 | Lung tissue                | NA                                                          | 2               | Osimeertinib                                                    | NA                            |
| P-3  | P-3-O1E     | M      | 50  | 1        | IVB   | ADC                 | Pericardial effusion       | EGFR 19 del                                                 | 3               | EP                                                              | NA                            |
| P-3  | P-3-O2T     | M      | 50  | 1        | IVB   | SCLC                | Paraspinal mass            | NA                                                          | 4               | Nab-paclitaxel                                                  | NA                            |
| P-5  | P-5-O1T     | M      | 61  | 1        | IVB   | ADC                 | Lung tissue                | NA                                                          | 4               | Docetaxel                                                       | NA                            |
| P-6  | P-6-O1T     | F      | 57  | 2        | IVB   | ADC                 | Lung tissue                | NA                                                          | 7               | Osimeertinib+IP                                                 | NA                            |
| P-7  | P-7-O1E     | F      | 34  | 2        | IVB   | ADC                 | Pericardial effusion       | Negative                                                    | 2               | NA                                                              | NA                            |
| P-8  | P-8-O1T     | F      | 80  | 1        | IVB   | ADC                 | Pleural mass               | EGFR L858R                                                  | 1               | Osimeertinib                                                    | NA                            |
| P-9  | P-9-O1T     | M      | 56  | 1        | IVB   | ADC                 | Lung tissue                | NA                                                          | 2               | PCB                                                             | NA                            |
| P-10 | P-10-O1E    | M      | 39  | 4        | IVB   | ADC                 | Pleural effusion           | NA                                                          | 2               | NA                                                              | NA                            |
| P-10 | P-10-O2T    | M      | 39  | 4        | IVB   | ADC                 | Lung tissue                | EGFR 19 del                                                 | 2               | NA                                                              | NA                            |
| P-11 | P-11-O1T    | F      | 57  | 2        | IVB   | ADC                 | Lung tissue                | NA                                                          | 6               | Paclitaxel                                                      | NA                            |
| P-12 | P-12-O1T    | F      | 55  | 1        | IVB   | ADC                 | Supraclavicular lymph node | EGFR 19 del                                                 | 2               | Osimeertinib                                                    | NA                            |
| P-12 | P-12-O2T    | F      | 55  | 1        | IVB   | ADC                 | Supraclavicular lymph node | NA                                                          | 3               | PCB                                                             | NA                            |
| P-12 | P-12-O3T    | F      | 55  | 1        | IVB   | ADC                 | Axillary lymph node        | EGFR 19 del; MET amplification                              | 4               | ABCP                                                            | CK7(+);TTF1(+);NapsinA(-)     |
| P-13 | P-13-O1E    | F      | 77  | 1        | IVA   | ADC                 | Pleural effusion           | NA                                                          | 2               | Beritinib + Bevacizumab                                         | NA                            |
| P-14 | P-14-O1E    | F      | 75  | 2        | IVB   | ADC                 | Pleural effusion           | MET 14 skipping                                             | 4               | Anlotinib                                                       | NA                            |
| P-16 | P-16-O1T    | F      | 67  | 1        | IVA   | ADC                 | Supraclavicular lymph node | EGFR 19 del                                                 | 3               | PCB                                                             | NA                            |
| P-17 | P-17-O1E    | F      | 40  | 1        | IVB   | ADC                 | Pleural effusion           | EGFR 19 del                                                 | 1               | Osimeertinib                                                    | NA                            |
| P-17 | P-17-O2E    | F      | 41  | 1        | IVB   | ADC                 | Pleural effusion           | EGFR 19 del                                                 | 2               | Osimeertinib                                                    | NA                            |
| P-17 | P-17-O3E    | F      | 41  | 1        | IVB   | ADC                 | Pleural effusion           | EGFR 19 del                                                 | 2               | Osimeertinib                                                    | NA                            |
| P-18 | P-18-O1T    | M      | 80  | 3        | IVB   | ADC                 | Supraclavicular lymph node | EGFR L858R;T790M                                            | 2               | Osimeertinib                                                    | CK7(+);TTF1(+);NapsinA(+)     |
| P-19 | P-19-O1T    | F      | 68  | 2        | IVB   | ADC                 | Paraspinal mass            | NA                                                          | 3               | NA                                                              | NA                            |
| P-23 | P-23-O1E    | M      | 51  | 3        | IVB   | ADC                 | Pericardial effusion       | NA                                                          | 7               | Afatinib+Cetuximab                                              | NA                            |
| P-23 | P-23-O2T    | M      | 51  | 3        | IVB   | ADC                 | Lung tissue                | EGFR L858R;EGFR L718Q;                                      | 7               | Afatinib+Cetuximab                                              | NA                            |
| P-24 | P-24-O1T    | M      | 65  | 1        | IVA   | ADC                 | Left adrenal puncture      | NA                                                          | 2               | PCB                                                             | NA                            |
| P-25 | P-25-O1E    | F      | 32  | 1        | IVB   | ADC                 | Pleural effusion           | CD74-ROS1 fusion, ROS1-intergenic fusion                    | 3               | PC                                                              | NA                            |
| P-27 | P-27-O1E    | M      | 55  | 3        | IVB   | ADC                 | Pericardial effusion       | EML4-ALK fusion                                             | 3               | Crizotinib                                                      | NA                            |
| P-28 | P-28-O1E    | M      | 41  | 1        | IVB   | ADC                 | Pleural effusion           | CD74-ROS1 fusion                                            | 2               | NA                                                              | NA                            |
| P-30 | P-30-O1E    | M      | 50  | 2        | IVB   | ADC                 | Ascitic effusion           | EGFR 19 del;T790M; RET fusion                               | 4               | Osimeertinib                                                    | NA                            |
| P-30 | P-30-O2E    | M      | 50  | 2        | IVB   | ADC                 | Ascitic effusion           | EGFR 19 del;T790M; RET fusion                               | 4               | Osimeertinib                                                    | NA                            |
| P-30 | P-30-O3E    | M      | 50  | 2        | IVB   | ADC                 | Pleural effusion           | EGFR 19 del;T790M;FAM118A-NTRK1 fusion;RET                  | 4               | Osimeertinib                                                    | NA                            |
| P-32 | P-32-O1T    | F      | 69  | 1        | IIIB  | ADC                 | Lymph node                 | EGFR L858R;T790M                                            | 1               | Osimeertinib                                                    | CK7(+);TTF1(-);NapsinA(+)     |
| P-33 | P-33-O1E    | F      | 54  | 1        | IVA   | ADC                 | Pleural effusion           | EML4-ALK fusion, ALK-C17orf75 fusion                        | 1               | Alectinib                                                       | CK7(+);TTF1(+);NapsinA(+)     |
| P-33 | P-33-O2T    | F      | 54  | 1        | IVA   | ADC                 | Supraclavicular lymph node | EML4-ALK fusion                                             | 1               | Alectinib                                                       | CK7(+);TTF1(+);NapsinA(+)     |
| P-34 | P-34-O1E    | M      | 41  | 2        | IVB   | ADC                 | Pleural effusion           | EGFR L858R                                                  | 1               | Osimeertinib                                                    | CK7(+);TTF1(+);NapsinA(+)     |
| P-36 | P-36-O1E    | M      | 72  | 1        | IVB   | ADC                 | Pleural effusion           | EGFR 20 ins                                                 | 6               | EMB-01                                                          | NA                            |
| P-37 | P-37-O1T    | F      | 67  | 1        | IVB   | ADC                 | Supraclavicular lymph node | NA                                                          | 1               | NA                                                              | NA                            |
| P-38 | P-38-O1T    | M      | 52  | 1        | IVB   | ADC                 | Supraclavicular lymph node | EGFR L858R                                                  | 2               | Osimeertinib+radiotherapy                                       | NA                            |
| P-40 | P-40-O1E    | M      | 71  | 2        | IVB   | ADC                 | Pleural effusion           | Negative                                                    | 1               | PCK                                                             | NA                            |
| P-41 | P-41-O1E    | F      | 59  | 1        | IVA   | ADC                 | Pleural effusion           | EGFR 19 del;T790M                                           | 2               | Osimeertinib                                                    | CK7(-);TTF1(-);NapsinA(+/-)   |
| P-42 | P-42-O1T    | M      | 33  | 1        | IVB   | ADC                 | Supraclavicular lymph node | EGFR-RAD51 fusion                                           | 4               | PCB                                                             | NA                            |
| P-43 | P-43-O1E    | F      | 49  | 1        | IVA   | ADC                 | Pleural effusion           | EGFR 19 del;T790M                                           | 2               | AZD9291 generic drug                                            | CK7(+);TTF1(+);NapsinA(+)     |
| P-44 | P-44-O1E    | F      | 52  | 1        | IVA   | ADC                 | Pleural effusion           | EGFR 19 del;T790M                                           | 2               | PCB                                                             | NA                            |
| P-45 | P-45-O1E    | M      | 69  | 1        | IVB   | ADC                 | Pleural effusion           | EGFR L858R                                                  | 3               | Afatinib+Crizotinib                                             | NA                            |
| P-46 | P-46-O2T    | M      | 68  | 1        | IVA   | ADC                 | Supraclavicular lymph node | KRAS p.G12C mutation                                        | 1               | PCK                                                             | CK7(-);TTF1(-);NapsinA(+/-)   |
| P-48 | P-48-O1E    | M      | 58  | 1        | IVB   | ADC                 | Pleural effusion           | EGFR L858R                                                  | 2               | Erlotinib + Bevacizumab                                         | CK7(+);TTF1(+);NapsinA(+)     |
| P-49 | P-49-O1E    | M      | 70  | 3        | IVB   | ADC                 | Pleural effusion           | Negative                                                    | 3               | Loratinib                                                       | NA                            |
| P-49 | P-49-O2E    | M      | 70  | 3        | IVB   | ADC                 | Pleural effusion           | Negative                                                    | 3               | Loratinib                                                       | NA                            |
| P-49 | P-49-O3E    | M      | 70  | 3        | IVB   | ADC                 | Pleural effusion           | Negative                                                    | 3               | Loratinib                                                       | CK7(+);TTF1(-);NapsinA(-)     |
| P-50 | P-50-O1E    | M      | 69  | 1        | IVA   | SCLC                | Pleural effusion           | NA                                                          | 1               | EP                                                              | CD56(-);CgA(-);Syn(-);TTF1(-) |
| P-51 | P-51-O1E    | M      | 63  | 1        | IVB   | SCC                 | Pleural effusion           | Negative                                                    | 1               | Nab-paclitaxel + carboplatin                                    | CK5/6(-);P63(+);P40(+)        |
| P-51 | P-51-O2E    | M      | 63  | 1        | IVB   | SCC                 | Pleural effusion           | Negative                                                    | 1               | Nab-paclitaxel + carboplatin                                    | CK5/6(-)                      |
| P-51 | P-51-O3E    | M      | 63  | 1        | IVB   | SCC                 | Pleural effusion           | Negative                                                    | 1               | Nab-paclitaxel + carboplatin                                    | P63+                          |



|      |          |   |    |   |      |      |                      |                                      |   |                            |                               |
|------|----------|---|----|---|------|------|----------------------|--------------------------------------|---|----------------------------|-------------------------------|
| P-51 | P-51-O4E | M | 63 | 2 | IVB  | SCC  | Pleural effusion     | Negative                             | 2 | Best Supportive Care       | CK5/6(-);P63(+);P40(+)        |
| P-51 | P-51-O5E | M | 63 | 2 | IVB  | SCC  | Pleural effusion     | Negative                             | 2 | Best Supportive Care       | CK5/6(+);P63(+);P40(+)        |
| P-53 | P-53-O1E | M | 51 | 1 | IVA  | ADC  | Pleural effusion     | Negative                             | 1 | Pembrolizumab              | NapsinA(-);TTF1(-);CK7(-)     |
| P-54 | P-54-O1E | F | 40 | 1 | IVB  | ASC  | Pleural effusion     | NA                                   | 2 | SAF-189s                   | NA                            |
| P-54 | P-54-O2E | F | 40 | 1 | IVB  | ASC  | Pleural effusion     | NA                                   | 2 | SAF-189s                   | NA                            |
| P-54 | P-54-O3E | F | 40 | 1 | IVB  | ASC  | Pleural effusion     | NA                                   | 2 | SAF-189s                   | NA                            |
| P-54 | P-54-O4E | F | 40 | 1 | IVB  | ASC  | Pleural effusion     | NA                                   | 2 | SAF-189s                   | NA                            |
| P-54 | P-54-O5E | F | 40 | 1 | IVB  | ASC  | Pleural effusion     | NA                                   | 2 | SAF-189s                   | NA                            |
| P-54 | P-54-O6E | F | 41 | 1 | IVB  | ASC  | Pleural effusion     | NA                                   | 2 | SAF-189s                   | NA                            |
| P-54 | P-54-O7E | F | 41 | 1 | IVB  | ASC  | Pleural effusion     | NA                                   | 2 | NA                         | NA                            |
| P-54 | P-54-O8E | F | 41 | 1 | IVB  | ASC  | Pleural effusion     | NA                                   | 2 | NA                         | NA                            |
| P-54 | P-54-O9E | F | 41 | 1 | IVB  | ASC  | Pleural effusion     | NA                                   | 2 | NA                         | NA                            |
| P-55 | P-55-O1T | F | 30 | 1 | IVB  | ADC  | Lymph node           | EGFR 19 del                          | 5 | Osimertinib                | NA                            |
| P-56 | P-56-O1E | M | 55 | 1 | IVA  | ADC  | Pleural effusion     | ERBB2 20ins                          | 1 | PCB                        | NapsinA(-);TTF1(-);CK7(-)     |
| P-56 | P-56-O2E | M | 55 | 1 | IVA  | ADC  | Pleural effusion     | ERBB2 20ins                          | 1 | PCB                        | NA                            |
| P-57 | P-57-O1T | F | 67 | 1 | IVB  | ADC  | Chest wall tumor     | NA                                   | 3 | PCB                        | NapsinA(+);TTF1(-);CK7(+)     |
| P-58 | P-58-O1E | F | 40 | 1 | IVB  | ADC  | Pleural effusion     | EGFR 20 ins                          | 2 | JNJ-61186372               | NapsinA(-);TTF1(+);CK7(+)     |
| P-58 | P-58-O2E | F | 40 | 1 | IVB  | ADC  | Pleural effusion     | EGFR 20 ins                          | 2 | JNJ-61186372               | NA                            |
| P-59 | P-59-O1E | F | 50 | 3 | IVB  | ADC  | Ascitic effusion     | EGFR L858R;T790M                     | 4 | Osimertinib                | NA                            |
| P-59 | P-59-O2E | F | 50 | 3 | IVB  | ADC  | Ascitic effusion     | EGFR L858R;T790M                     | 4 | Osimertinib                | NapsinA(+);TTF1(+);CK7(+)     |
| P-59 | P-59-O3E | F | 50 | 3 | IVB  | ADC  | Ascitic effusion     | EGFR L858R;T790M                     | 4 | Osimertinib                | NapsinA(+);TTF1(+);CK7(+)     |
| P-59 | P-59-O4E | F | 50 | 3 | IVB  | ADC  | Ascitic effusion     | EGFR L858R;T790M                     | 4 | Osimertinib                | NapsinA(+);TTF1(+);CK7(+)     |
| P-59 | P-59-O5E | F | 50 | 3 | IVB  | ADC  | Pleural effusion     | EGFR L858R;T790M                     | 4 | Osimertinib                | NapsinA(-);TTF1(+);CK7(+)     |
| P-60 | P-60-O1T | M | 55 | 1 | IVB  | ADC  | Lymph node           | EGFR L858R;MET amplification         | 2 | Osimertinib + Savolitinib  | NapsinA(+);TTF1(+);CK7(+)     |
| P-60 | P-60-O2E | M | 55 | 1 | IVB  | ADC  | Pericardial effusion | EGFR L858R;MET amplification         | 2 | Osimertinib + Savolitinib  | NapsinA(+);TTF1(-);CK7(+)     |
| P-60 | P-60-O3E | M | 55 | 1 | IVB  | ADC  | Pericardial effusion | EGFR L858R;MET amplification         | 2 | Osimertinib + Savolitinib  | NapsinA(+);TTF1(+);CK7(+)     |
| P-60 | P-60-O4E | M | 55 | 1 | IVB  | ADC  | Pericardial effusion | EGFR L858R;MET amplification         | 2 | Osimertinib + Savolitinib  | NapsinA(+);TTF1(-);CK7(+)     |
| P-60 | P-60-O5E | M | 56 | 2 | IVB  | ADC  | Pericardial effusion | EGFR L858R;MET amplification         | 4 | Osimertinib + Savolitinib  | NapsinA(+);TTF1(+);CK7(+)     |
| P-61 | P-61-O1E | F | 51 | 3 | IVB  | ADC  | Ascitic effusion     | EGFR 19 del;T790M,RET fusion         | 4 | Osimertinib +Cabozantinib  | NapsinA(+);TTF1(+);CK7(+)     |
| P-61 | P-61-O2E | F | 51 | 3 | IVB  | ADC  | Ascitic effusion     | EGFR 19 del;T790M,RET fusion         | 4 | Osimertinib +Cabozantinib  | NapsinA(+);TTF1(+);CK7(+)     |
| P-61 | P-61-O3E | F | 51 | 3 | IVB  | ADC  | Ascitic effusion     | EGFR 19 del;T790M,RET fusion         | 4 | Osimertinib +Cabozantinib  | NapsinA(+);TTF1(+);CK7(+)     |
| P-61 | P-61-O4E | F | 51 | 3 | IVB  | ADC  | Pleural effusion     | EGFR 19 del;T790M,RET fusion         | 4 | Osimertinib +Cabozantinib  | NapsinA(+);TTF1(+);CK7(+)     |
| P-61 | P-61-O5E | F | 51 | 3 | IVB  | ADC  | Pleural effusion     | EGFR 19 del;T790M,RET fusion         | 4 | Osimertinib +Cabozantinib  | NapsinA(+);TTF1(+);CK7(+)     |
| P-63 | P-63-O1E | F | 38 | 1 | IVB  | ADC  | Pleural effusion     | EML4-ALK fusion, ALK F1174C mutation | 3 | Alectinib                  | NA                            |
| P-63 | P-63-O2E | F | 38 | 1 | IVB  | ADC  | Pleural effusion     | EML4-ALK fusion, ALK F1174C mutation | 3 | Alectinib                  | NapsinA(+);TTF1(+);CK7(+)     |
| P-63 | P-63-O3E | F | 38 | 1 | IVB  | ADC  | Pleural effusion     | EML4-ALK fusion, ALK F1174C mutation | 3 | Alectinib                  | NapsinA(+);CK7(+)             |
| P-65 | P-65-O1E | M | 66 | 1 | IIIC | SCLC | Pleural effusion     | NA                                   | 1 | EP                         | NA                            |
| P-69 | P-69-O1E | M | 65 | 3 | IVA  | ADC  | Pericardial effusion | NA                                   | 1 | Best Supportive Care       | NA                            |
| P-69 | P-69-O2E | M | 65 | 3 | IVA  | ADC  | Pericardial effusion | NA                                   | 1 | Best Supportive Care       | NA                            |
| P-69 | P-69-O3E | M | 65 | 3 | IVA  | ADC  | Pleural effusion     | Negative                             | 1 | Best Supportive Care       | NapsinA(+);TTF1(+);CK7(+)     |
| P-69 | P-69-O4E | M | 65 | 3 | IVA  | ADC  | Pleural effusion     | Negative                             | 1 | Best Supportive Care       | NapsinA(+);TTF1(+);CK7(+)     |
| P-69 | P-69-O5E | M | 65 | 3 | IVA  | ADC  | Pleural effusion     | Negative                             | 1 | Best Supportive Care       | NapsinA(+);TTF1(+);CK7(+)     |
| P-70 | P-70-O1E | M | 54 | 3 | IVB  | ADC  | Pleural effusion     | EGFR L858R                           | 2 | Osimertinib                | NapsinA(-/+);TTF1(+);CK7(+)   |
| P-70 | P-70-O2E | M | 54 | 3 | IVB  | ADC  | Pleural effusion     | EGFR L858R                           | 2 | Osimertinib                | CK7(-);NapsinA(-);TTF1(-)     |
| P-73 | P-73-O1T | M | 70 | 2 | IVB  | SCLC | Lymph node           | NA                                   | 1 | Nab-paclitaxel             | CD56(+);CgA(+);Syn(+);TTF1(+) |
| P-74 | P-74-O1T | F | 68 | 1 | IVB  | ADC  | Lymph node           | EML4-ALK fusion                      | 1 | SAF-189s                   | NA                            |
| P-75 | P-75-O1E | M | 58 | 1 | IVB  | ADC  | Pleural effusion     | ERBB2 20ins                          | 1 | Pyrotinib                  | NapsinA(+);TTF1(+);CK7(+)     |
| P-75 | P-75-O2E | M | 58 | 1 | IVB  | ADC  | Pleural effusion     | ERBB2 20ins                          | 1 | Pyrotinib                  | NapsinA(+);TTF1(+);CK7(+)     |
| P-75 | P-75-O3E | M | 58 | 1 | IVB  | ADC  | Pleural effusion     | ERBB2 20ins                          | 1 | Pyrotinib                  | NapsinA(-);TTF1(+);CK7(+)     |
| P-76 | P-76-O1E | M | 70 | 3 | IVB  | ADC  | Pleural effusion     | Negative                             | 1 | Pemetrexed + pembrolizumab | NapsinA(-);TTF1(+);CK7(+)     |
| P-76 | P-76-O2E | M | 70 | 3 | IVB  | ADC  | Pleural effusion     | Negative                             | 1 | Pemetrexed + pembrolizumab | NapsinA(-);TTF1(-);CK7(+)     |
| P-76 | P-76-O3E | M | 70 | 3 | IVB  | ADC  | Pleural effusion     | Negative                             | 1 | Pemetrexed + pembrolizumab | NA                            |
| P-77 | P-77-O1E | F | 70 | 1 | IVA  | ADC  | Pleural effusion     | EGFR L858R;T790M                     | 2 | Osimertinib                | NapsinA(+);TTF1(+);CK7(+)     |
| P-77 | P-77-O2E | F | 70 | 1 | IVA  | ADC  | Pleural effusion     | EGFR L858R;T790M                     | 2 | Osimertinib                | NapsinA(+);TTF1(+);CK7(+)     |
| P-78 | P-78-O1E | F | 50 | 1 | IVB  | ADC  | Pleural effusion     | EGFR L858R                           | 1 | Osimertinib                | NapsinA(+);TTF1(-);CK7(+)     |
| P-78 | P-78-O2E | F | 50 | 1 | IVB  | ADC  | Pleural effusion     | EGFR L858R                           | 1 | Osimertinib                | NA                            |
| P-79 | P-79-O1E | F | 64 | 1 | IVB  | ADC  | Ascitic effusion     | EGFR L858R;T790M ;cis-C797S mutation | 3 | PCB                        | NapsinA(+);TTF1(+);CK7(+)     |

|       |           |   |    |   |      |      |                      |                                      |   |                                 |                                                      |
|-------|-----------|---|----|---|------|------|----------------------|--------------------------------------|---|---------------------------------|------------------------------------------------------|
| P-79  | P-79-O2E  | F | 64 | 1 | IVB  | ADC  | Ascitic effusion     | EGFR L858R;T790M ;cis-C797S mutation | 3 | PCB                             | NapsinA(+);TTF1(+);CK7(+)                            |
| P-79  | P-79-O3E  | F | 64 | 1 | IVB  | ADC  | Ascitic effusion     | EGFR L858R;T790M ;cis-C797S mutation | 3 | PCB                             | NapsinA(+);TTF1(+);CK7(+)                            |
| P-81  | P-81-O1E  | F | 62 | 2 | IVB  | ADC  | Pleural effusion     | EGFR 19del                           | 3 | Nab-paclitaxel                  | NapsinA(-);TTF1(+);CK7(+);<br>CD56(-);CgA(-);Syn(+)  |
| P-82  | P-82-O1E  | M | 75 | 2 | IVA  | SCLC | Pleural effusion     | NA                                   | 1 | Nab-paclitaxel                  | CD56(-);CgA(-);Syn(+)                                |
| P-83  | P-83-O1E  | M | 77 | 1 | IVB  | SCLC | Pleural effusion     | NA                                   | 1 | EC                              | CD56(-);CgA(+);Syn(+);TTF1(+)                        |
| P-84  | P-84-O1E  | M | 54 | 1 | IVB  | SCLC | Pleural effusion     | NA                                   | 1 | NA                              | NA                                                   |
| P-85  | P-85-O1E  | F | 32 | 1 | IVB  | ADC  | Ascitic effusion     | EGFR 19 del                          | 4 | TDM1                            | NapsinA(+);TTF1(+);CK7(+)                            |
| P-85  | P-85-O2E  | F | 32 | 1 | IVB  | ADC  | Ascitic effusion     | EGFR 19 del                          | 4 | TDM1                            | NapsinA(+);TTF1(+);CK7(+)                            |
| P-85  | P-85-O3E  | F | 32 | 1 | IVB  | ADC  | Ascitic effusion     | EGFR 19 del                          | 4 | Nab-paclitaxel +anlotinib       | NapsinA(+);TTF1(+);CK7(+)                            |
| P-86  | P-86-O1E  | F | 74 | 1 | IVA  | ADC  | Pleural effusion     | MET 14 skipping                      | 1 | Bozitinib                       | CK7(+)                                               |
| P-87  | P-87-O1E  | F | 51 | 1 | IVA  | ASC  | Pleural effusion     | EGFR L858R                           | 1 | Afatinib                        | CK5/6(-);P63(-);P40(-);<br>NapsinA(-);TTF1(+);CK7(+) |
| P-87  | P-87-O2E  | F | 51 | 1 | IVA  | ASC  | Pleural effusion     | EGFR L858R                           | 1 | Afatinib                        | CK5/6(-);P63(-);P40(-);<br>NapsinA(-);TTF1(-);CK7(+) |
| P-87  | P-87-O3E  | F | 51 | 1 | IVA  | ASC  | Pleural effusion     | EGFR L858R                           | 1 | Afatinib                        | CK5/6(-);P63(-);P40(-);<br>NapsinA(-);TTF1(-);CK7(+) |
| P-88  | P-88-O1E  | F | 82 | 1 | IVA  | ADC  | Pleural effusion     | NA                                   | 1 | NA                              | NapsinA(+);TTF1(+);CK7(+)                            |
| P-89  | P-89-O1E  | M | 28 | 1 | IVB  | ADC  | Pleural effusion     | EGFR 19 del                          | 1 | Osimertinib                     | NapsinA(+);TTF1(-);CK7(+)                            |
| P-89  | P-89-O2E  | M | 28 | 1 | IVB  | ADC  | Pleural effusion     | EGFR 19 del                          | 1 | Osimertinib                     | NapsinA(+);TTF1(-);CK7(+)                            |
| P-90  | P-90-O1E  | F | 58 | 4 | IVB  | SCC  | Pleural effusion     | EGFR 19 del                          | 2 | Osimertinib                     | NA                                                   |
| P-90  | P-90-O2E  | F | 58 | 4 | IVB  | SCC  | Pleural effusion     | EGFR 19 del                          | 2 | Osimertinib                     | NA                                                   |
| P-93  | P-93-O1E  | M | 55 | 1 | IVA  | ADC  | Pleural effusion     | EML4-ALK fusion                      | 3 | Nab-paclitaxel+Carboplatin + Be | NapsinA(+);TTF1(+);CK7(+)                            |
| P-94  | P-94-O1E  | M | 58 | 1 | IVB  | ADC  | Pleural effusion     | NA                                   | 2 | Afatinib+IP                     | NA                                                   |
| P-94  | P-94-O2E  | M | 58 | 1 | IVB  | ADC  | Pleural effusion     | NA                                   | 2 | Afatinib+IP                     | NapsinA(-);TTF1(-)                                   |
| P-94  | P-94-O3E  | M | 58 | 1 | IVB  | ADC  | Pleural effusion     | NA                                   | 2 | Afatinib+IP                     | NapsinA(-);TTF1(-);CK7(+)                            |
| P-95  | P-95-O1E  | F | 62 | 1 | IVB  | ADC  | Pleural effusion     | BRAF V600E                           | 1 | Darafenib + trametinib          | NapsinA(+);TTF1(+);CK7(+)                            |
| P-95  | P-95-O2E  | F | 62 | 1 | IVB  | ADC  | Pleural effusion     | BRAF V600E                           | 1 | Darafenib + trametinib          | NA                                                   |
| P-95  | P-95-O3E  | F | 62 | 1 | IVB  | ADC  | Pleural effusion     | BRAF V600E                           | 1 | Darafenib + trametinib          | NapsinA(+);TTF1(+);CK7(+)                            |
| P-96  | P-96-O1E  | F | 75 | 4 | IVA  | ADC  | Pleural effusion     | EGFR 19 del                          | 3 | NA                              | NapsinA(-);TTF1(-);CK7(-)                            |
| P-96  | P-96-O2E  | F | 75 | 4 | IVA  | ADC  | Pleural effusion     | EGFR 19 del                          | 3 | NA                              | NapsinA(-);TTF1(-);CK7(-)                            |
| P-96  | P-96-O3E  | F | 75 | 4 | IVA  | ADC  | Pleural effusion     | EGFR 19 del                          | 3 | NA                              | NapsinA(-);TTF1(-);CK7(-)                            |
| P-97  | P-97-O1E  | M | 59 | 1 | IVB  | ADC  | Pleural effusion     | EGFR L858R;T790M                     | 2 | PLB1004                         | NapsinA(+);TTF1(+);CK7(+)                            |
| P-97  | P-97-O2E  | M | 59 | 1 | IVB  | ADC  | Pleural effusion     | EGFR L858R;T790M                     | 2 | PLB1004                         | NapsinA(+);TTF1(+);CK7(+)                            |
| P-97  | P-97-O3E  | M | 59 | 1 | IVB  | ADC  | Pleural effusion     | EGFR L858R;T790M                     | 2 | PLB1004                         | NapsinA(+);TTF1(+);CK7(+)                            |
| P-98  | P-98-O1E  | M | 54 | 1 | IVB  | ADC  | Pleural effusion     | EGFR 19 del                          | 1 | Afatinib                        | NA                                                   |
| P-98  | P-98-O2E  | M | 54 | 1 | IVB  | ADC  | Pleural effusion     | EGFR 19 del                          | 1 | Afatinib                        | NA                                                   |
| P-98  | P-98-O3E  | M | 54 | 1 | IVB  | ADC  | Pleural effusion     | EGFR 19 del                          | 1 | Afatinib                        | NA                                                   |
| P-99  | P-99-O1E  | M | 72 | 1 | IVA  | SCLC | Pleural effusion     | NA                                   | 1 | EC                              | NA                                                   |
| P-99  | P-99-O2E  | M | 72 | 1 | IVA  | SCLC | Pleural effusion     | NA                                   | 1 | EC                              | NA                                                   |
| P-100 | P-100-O1E | M | 35 | 1 | IVB  | ADC  | Pleural effusion     | EGFR L858R;T790M ;cis-C797S mutation | 3 | TQB3804                         | NapsinA(+);TTF1(+);CK7(+)                            |
| P-100 | P-100-O2E | M | 35 | 1 | IVB  | ADC  | Pleural effusion     | EGFR L858R;T790M ;cis-C797S mutation | 3 | TQB3804                         | NA                                                   |
| P-100 | P-100-O3E | M | 35 | 1 | IVB  | ADC  | Pleural effusion     | EGFR L858R;T790M ;cis-C797S mutation | 3 | TQB3804                         | TTF1(-);CK7(-)                                       |
| P-101 | P-101-O1E | M | 66 | 2 | IVB  | ADC  | Pericardial effusion | EGFR 20 ins                          | 1 | NA                              | NapsinA(+);TTF1(+);CK7(+)                            |
| P-101 | P-101-O2E | M | 66 | 2 | IVB  | ADC  | Pericardial effusion | EGFR 20 ins                          | 1 | NA                              | NapsinA(+);TTF1(+);CK7(+)                            |
| P-101 | P-101-O3E | M | 66 | 2 | IVB  | ADC  | Pericardial effusion | EGFR 20 ins                          | 1 | NA                              | NapsinA(-);TTF1(-);CK7(+)                            |
| P-102 | P-102-O1E | F | 52 | 1 | IVB  | SCC  | Pleural effusion     | KIF5B-RET fusion                     | 2 | LOXO-292                        | NA                                                   |
| P-102 | P-102-O2E | F | 52 | 1 | IVB  | SCC  | Pleural effusion     | KIF5B-RET fusion                     | 2 | LOXO-292                        | NA                                                   |
| P-103 | P-103-O1E | M | 39 | 1 | IVA  | ADC  | Pericardial effusion | EML4-ALK fusion                      | 3 | NA                              | NA                                                   |
| P-103 | P-103-O2E | M | 39 | 1 | IVA  | ADC  | Pleural effusion     | EML4-ALK fusion                      | 3 | NA                              | NA                                                   |
| P-103 | P-103-O3E | M | 39 | 1 | IVA  | ADC  | Pleural effusion     | EML4-ALK fusion                      | 3 | Nab-paclitaxel+Carboplatin + Be | NA                                                   |
| P-103 | P-103-O4E | M | 39 | 1 | IVA  | ADC  | Pleural effusion     | EML4-ALK fusion                      | 3 | Nab-paclitaxel+Carboplatin + Be | NA                                                   |
| P-105 | P-105-O1T | M | 59 | 1 | IVB  | SAR  | Muscle mass          | MET 14 skipping                      | 1 | Crizotinib                      | NA                                                   |
| P-106 | P-106-O1T | M | 60 | 1 | IIIB | SCC  | Lung tissue          | NA                                   | 1 | NA                              | CK5/6(++);P63(+);P40(+)                              |
| P-107 | P-107-O1E | F | 48 | 1 | IVB  | SCLC | Pleural effusion     | NA                                   | 4 | ABCP                            | CgA(+);Syn(+);CD56(+)                                |

Abbreviations:IHC: immunohistochemistry; M: male; F: female; SCLC: small cell lung cancer; ADC: adenocarcinoma; SCC: squamous cell carcinoma; ASC: adenosquamous carcinoma; SAR: sarcomatoid carcinoma; NA: not available;

IC50: half-maximal inhibitory concentration; EP: Etoposide + Cisplatin; IP: Irinotecan + Carboplatin; PCB: Pemetrexed + Carboplatin + Bevacizumab; ABCP: Atezolizumab + + Bevacizumab + Carboplatin + Paclitaxel; PC:

Pemetrexed + Carboplatin; PCK: Pemetrexed + carboplatin + pembrolizumab; EC: Etoposide + Carboplatin; Driver mutation: EGFR, ALK, HER2, MET, RET, ROS1, BRAF, KRAS.

**Table S2. The list of lung cancer samples used for failed establishment of patient-derived organoids. Related to Figure 1A.**

| Case | Organoid ID | Culture Results | Cell counts          | Gender | Age | ECOG     |       | Treatment lines | Pathology      | Site of sampling           | Driver mutation detected by routine genetic testing or FISH |
|------|-------------|-----------------|----------------------|--------|-----|----------|-------|-----------------|----------------|----------------------------|-------------------------------------------------------------|
|      |             |                 |                      |        |     | PS score | Stage |                 |                |                            |                                                             |
| P-3  | P-3-F1T     | Failure         | 2.32×10 <sup>3</sup> | M      | 50  | 1        | IVB   | 4               | SCLC           | Paravertebral tumor        | NA                                                          |
| P-4  | P-4-F1T     | Failure         | N/A                  | M      | 65  | 1        | IVB   | 3               | ADC            | Supraclavicular lymph node | EGFR 19del                                                  |
| P-5  | P-5-F1T     | Failure         | N/A                  | M      | 61  | 3        | IVB   | 5               | ADC            | Chest wall tumor           | NA                                                          |
| P-6  | P-6-F1T     | Failure         | N/A                  | F      | 57  | 0        | IVB   | 7               | SCLC           | Abdominal neoplasm         | EGFR 19del                                                  |
| P-8  | P-8-F1E     | Failure         | N/A                  | F      | 80  | 1        | IVB   | 3               | ADC            | Pleural effusion           | NA                                                          |
| P-15 | P-15-F1E    | Failure         | N/A                  | F      | 64  | 3        | IVB   | 4               | NO Tumor cells | Pleural effusion           | NA                                                          |
| P-17 | P-17-F1E    | Failure         | 2.50×10 <sup>6</sup> | F      | 41  | 1        | IVB   | 3               | ADC            | Pleural effusion           | EGFR 19del                                                  |
| P-17 | P-17-F2T    | Failure         | 4.02×10 <sup>6</sup> | F      | 41  | 1        | IVB   | 3               | ADC            | Brain metastases           | EGFR 19del                                                  |
| P-19 | P-19-F1T    | Failure         | N/A                  | F      | 68  | 2        | IVB   | 2               | ADC            | Thoracic tumor             | EGFR L858R                                                  |
| P-20 | P-20-F1E    | Failure         | N/A                  | F      | 62  | 4        | IVB   | 5               | ADC            | Pleural effusion           | NA                                                          |
| P-21 | P-21-F1T    | Failure         | N/A                  | M      | 65  | 1        | IVB   | 3               | ADC            | Liver tissue               | MET 14 skipping                                             |
| P-22 | P-22-F1T    | Failure         | N/A                  | M      | 38  | 2        | IVB   | 2               | SCLC           | Scapular mass              | EGFR L858R                                                  |
| P-25 | P-25-F1E    | Failure         | N/A                  | F      | 32  | 1        | IVB   | 4               | NA             | Cerebrospinal fluid        | CD74-ROS1 fusion                                            |
| P-26 | P-26-F1T    | Failure         | N/A                  | M      | 39  | 2        | IVB   | 4               | ADC            | Axillary lymph node        | EGFR 19del                                                  |
| P-27 | P-27-F1T    | Failure         | 4.50×10 <sup>5</sup> | M      | 55  | 3        | IVB   | 2               | ADC            | Chest wall tumor           | EML4-ALK fusion                                             |
| P-29 | P-29-F1T    | Failure         | N/A                  | F      | 59  | 1        | IVB   | 5               | ADC            | Liver tissue               | NA                                                          |
| P-31 | P-31-F1T    | Failure         | N/A                  | F      | 48  | 2        | IVB   | 5               | ADC            | Liver tissue               | EGFR L858R,T790M                                            |
| P-35 | P-35-F1T    | Failure         | 2.20×10 <sup>5</sup> | M      | 57  | 2        | IVB   | 4               | ADC            | Liver tissue               | NA                                                          |
| P-36 | P-36-F1E    | Failure         | N/A                  | M      | 72  | 1        | IVB   | 9               | ADC            | Pleural effusion           | EGFR 20 ins                                                 |
| P-39 | P-39-F1T    | Failure         | 3.20×10 <sup>5</sup> | M      | 44  | 1        | IVB   | 1               | ADC            | Supraclavicular lymph node | EGFR 19del                                                  |
| P-40 | P-40-F1E    | Failure         | 2.43×10 <sup>2</sup> | M      | 71  | 1        | IVB   | 1               | NO Tumor cells | Pleural effusion           | Negative                                                    |
| P-47 | P-47-F1T    | Failure         | 2.85×10 <sup>5</sup> | M      | 60  | 1        | IVB   | 1               | SCC            | Supraclavicular lymph node | Negative                                                    |
| P-51 | P-51-F1E    | Failure         | 9.80×10 <sup>5</sup> | M      | 64  | 2        | IVB   | 2               | SCC            | Pleural effusion           | Negative                                                    |
| P-52 | P-52-F1E    | Failure         | 1.19×10 <sup>7</sup> | M      | 72  | 1        | IVB   | 2               | SCLC           | Pleural effusion           | NA                                                          |
| P-52 | P-52-F2E    | Failure         | 3.27×10 <sup>5</sup> | M      | 72  | 1        | IVB   | 2               | SCLC           | Pleural effusion           | NA                                                          |
| P-52 | P-52-F3E    | Failure         | 2.00×10 <sup>3</sup> | M      | 72  | 1        | IVB   | 2               | SCLC           | Pleural effusion           | NA                                                          |
| P-56 | P-56-F1E    | Failure         | 2.60×10 <sup>5</sup> | M      | 55  | 1        | IVB   | 2               | ADC            | Pleural effusion           | ERBB2 20ins                                                 |
| P-59 | P-59-F1E    | Failure         | 7.22×10 <sup>6</sup> | F      | 50  | 3        | IVB   | 3               | ADC            | Abdominal cavity effusion  | EGFR L858R,T790M                                            |
| P-62 | P-62-F1T    | Failure         | 1.50×10 <sup>3</sup> | M      | 54  | 1        | IVA   | 4               | ADC            | Lymph node                 | EGFR L858R                                                  |
| P-64 | P-64-F1T    | Failure         | 3.50×10 <sup>2</sup> | F      | 73  | 1        | IVB   | 2               | NO Tumor cells | Lymph node                 | NA                                                          |
| P-66 | P-66-F1E    | Failure         | 2.52×10 <sup>6</sup> | F      | 54  | 1        | IVB   | 2               | ADC            | Pleural effusion           | EGFR 19del ,T790M                                           |
| P-67 | P-67-F1E    | Failure         | 6.04×10 <sup>3</sup> | M      | 74  | 1        | IVA   | 1               | NO Tumor cells | Pleural effusion           | NA                                                          |
| P-67 | P-67-F2E    | Failure         | 1.56×10 <sup>6</sup> | M      | 74  | 1        | IVA   | 1               | NO Tumor cells | Pleural effusion           | NA                                                          |
| P-67 | P-67-F3E    | Failure         | 1.51×10 <sup>6</sup> | M      | 74  | 1        | IVA   | 1               | NO Tumor cells | Pleural effusion           | NA                                                          |
| P-68 | P-67-F4T    | Failure         | 0                    | M      | 51  | 1        | IVA   | 2               | ADC            | Lymph node                 | EGFR 19del                                                  |
| P-71 | P-71-F1T    | Failure         | 1.44×10 <sup>6</sup> | F      | 55  | 1        | IVA   | 1               | ADC            | Lymph node                 | RET fusion                                                  |
| P-72 | P-72-F1T    | Failure         | 2.65×10 <sup>3</sup> | M      | 65  | 1        | IVA   | 1               | SCC            | Lymph node                 | Negative                                                    |
| P-78 | P-78-F1E    | Failure         | 1.74×10 <sup>7</sup> | F      | 50  | 1        | IVB   | 1               | ADC            | Pleural effusion           | EGFR L858R                                                  |
| P-80 | P-80-F1T    | Failure         | 1.50×10 <sup>2</sup> | F      | 46  | 1        | IVB   | 1               | ADC            | Lymph node                 | EGFR L858R                                                  |
| P-81 | P-81-F1E    | Failure         | 3.27×10 <sup>6</sup> | F      | 62  | 2        | IVB   | 3               | SCLC           | Pleural effusion           | EGFR 19del                                                  |

|       |           |         |                      |   |    |   |      |   |                |                            |                  |
|-------|-----------|---------|----------------------|---|----|---|------|---|----------------|----------------------------|------------------|
| P-82  | P-82-F1E  | Failure | 6.45×10 <sup>5</sup> | M | 75 | 2 | IVB  | 1 | SCLC           | Pleural effusion           | NA               |
| P-82  | P-82-F2E  | Failure | 9.00×10 <sup>3</sup> | M | 75 | 2 | IVB  | 1 | NO Tumor cells | Pleural effusion           | NA               |
| P-89  | P-89-F1T  | Failure | 2.50×10 <sup>2</sup> | M | 28 | 1 | IVB  | 1 | ADC            | Supraclavicular lymph node | EGFR 19del       |
| P-90  | P-90-F1E  | Failure | 3.00×10 <sup>3</sup> | F | 58 | 4 | IVB  | 2 | SCC            | Pleural effusion           | Negative         |
| P-91  | P-91-F1E  | Failure | 1.33×10 <sup>3</sup> | M | 57 | 1 | IIIB | 2 | NO Tumor cells | Pleural effusion           | NA               |
| P-91  | P-91-F2E  | Failure | 3.10×10 <sup>3</sup> | M | 57 | 1 | IIIB | 2 | NO Tumor cells | Pleural effusion           | NA               |
| P-91  | P-91-F3E  | Failure | 4.00×10 <sup>3</sup> | M | 57 | 1 | IIIB | 2 | NO Tumor cells | Pleural effusion           | NA               |
| P-92  | P-92-F1E  | Failure | 3.40×10 <sup>3</sup> | F | 56 | 1 | IVB  | 1 | ASC            | Pleural effusion           | NA               |
| P-102 | P-102-F1E | Failure | 4.30×10 <sup>2</sup> | F | 52 | 1 | IVB  | 2 | SCC            | Pleural effusion           | KIF5B-RET fusion |
| P-103 | P-103-F1E | Failure | 1.75×10 <sup>3</sup> | M | 39 | 1 | IVB  | 3 | ADC            | Pericardial effusion       | EML4-ALK fusion  |
| P-103 | P-103-F2E | Failure | 1.54×10 <sup>3</sup> | M | 39 | 1 | IVB  | 3 | ADC            | Pericardial effusion       | EML4-ALK fusion  |
| P-104 | P-104-F1E | Failure | 2.00×10 <sup>3</sup> | M | 62 | 2 | IVB  | 2 | ADC            | Cerebrospinal fluid        | EGFR 19 del      |

Abbreviations: IHC: immunohistochemistry; M: male; F: female; SCLC: small cell lung cancer; ADC: adenocarcinoma; SCC: squamous cell carcinoma; NA: not available; N/A: The cell counter cannot count due to insufficient number of cells; Driver mutation: EGFR, ALK, HER2, MET, RET, ROS1, BRAF, KRAS.

**Table S3. Univariate model and multivariate model for organoid culture. Related to Figure 1A.**

| Factors            | Cases | Univariate model |               |         | Multivariate model |               |         |
|--------------------|-------|------------------|---------------|---------|--------------------|---------------|---------|
|                    |       | Odds Ratio       | 95% CI        | P       | Odds               | 95% CI        | P       |
| Gender             |       |                  |               |         |                    |               |         |
| Male               | 117   | Reference        |               |         |                    |               |         |
| Female             | 97    | 0.55             | (0.25 - 1.17) | 0.1213  |                    |               |         |
| Age                |       |                  |               |         |                    |               |         |
| <65                | 155   | Reference        |               |         |                    |               |         |
| ≥65                | 59    | 1.63             | (0.69 - 3.87) | 0.2662  |                    |               |         |
| ECOG PS            |       |                  |               |         |                    |               |         |
| 0-1                | 145   | Reference        |               |         |                    |               |         |
| ≥2                 | 69    | 0.96             | (0.43 - 2.14) | 0.9195  |                    |               |         |
| Stage              |       |                  |               |         |                    |               |         |
| IIIB-IVA           | 49    | Reference        |               |         |                    |               |         |
| IVB                | 165   | 1.41             | (0.55 - 3.64) | 0.4805  |                    |               |         |
| Pathology          |       |                  |               |         |                    |               |         |
| ADC                | 156   | 6                |               |         | Reference          |               |         |
| Other              | 58    | 0.13             | (0.05 - 0.32) | <0.0001 | 0.21               | (0.10 - 0.43) | <0.0001 |
| Lines of treatment |       |                  |               |         |                    |               |         |
| 1                  | 69    | Reference        |               |         |                    |               |         |
| ≥2                 | 145   | 2.30             | (0.92 - 5.72) | 0.0736  |                    |               |         |
| Sampling type      |       |                  |               |         |                    |               |         |
| Tissue             | 162   | Reference        |               |         | Reference          |               |         |
| Effusion           | 52    | 4.47             | (2.01 - 9.91) | 0.0002  | 4.50               | (2.12 - 9.53) | <0.0001 |
| Gene               |       |                  |               |         |                    |               |         |
| <i>EGFR</i>        | 76    | Reference        |               |         |                    |               |         |
| Other              | 52    | 0.68             | (0.25 - 1.90) | 0.4657  |                    |               |         |
| Negative           | 23    | 0.53             | (0.13 - 2.20) | 0.3815  |                    |               |         |
| NA                 | 63    | 0.46             | (0.17 - 1.24) | 0.1247  |                    |               |         |

Abbreviations: ADC: adenocarcinoma; NA: not available; *EGFR*: epidermal growth factor receptor

**Table S4. The clinicopathological characteristics of genomic profiling cohort. Related to Figure 2A.**

| <b>Characteristics</b>            | <b>No. (%)</b> |
|-----------------------------------|----------------|
| <b>Age (median[range], years)</b> | 55[32-75]      |
| <b>Gender</b>                     |                |
| Female                            | 12 (48%)       |
| Male                              | 13 (52%)       |
| <b>Histology</b>                  |                |
| ADC                               | 22 (88%)       |
| SCC                               | 2 (8%)         |
| ASC                               | 1 (4%)         |
| <b>Stage</b>                      |                |
| IVA                               | 8 (32%)        |
| IVB                               | 17 (68%)       |
| <b>Treatment line</b>             |                |
| 1                                 | 8 (32%)        |
| 2                                 | 7 (28%)        |
| 3                                 | 7 (28%)        |
| 4                                 | 2 (8%)         |
| 6                                 | 1 (4%)         |
| <b>Total</b>                      | <b>25</b>      |

Abbreviations: SCLC: small cell lung cancer; ADC: adenocarcinoma; SCC: squamous cell carcinoma.

**Table S5. List of genes for paired-samples. Related to Figure 2A.**

| Case | Organoid | Gene   | Description                      | Mutation Type                | Match.status  |
|------|----------|--------|----------------------------------|------------------------------|---------------|
| P-25 | P-25-O1E | ROS1   | CD74-ROS1                        | gene fusion                  | Match         |
| P-25 | P-25-O1E | ROS1   | p.G2032R                         | missense variant             | Match         |
| P-25 | P-25-O1E | ROS1   | ROS1-intergenic(VIP,FBXO5)       | gene fusion                  | Match         |
| P-48 | P-48-O1E | DNAJB1 | p.R249T                          | missense variant             | LCO only      |
| P-48 | P-48-O1E | EGFR   | p.L858R                          | missense variant             | Match         |
| P-48 | P-48-O1E | MAP2K4 | p.D296H                          | missense variant             | LCO only      |
| P-48 | P-48-O1E | PIK3R1 | c.1745+1G>A                      | splice donor variant         | LCO only      |
| P-51 | P-51-O1E | DNMT3A | p.N776T                          | missense variant             | Match         |
| P-51 | P-51-O1E | FLT1   | p.F192L                          | missense variant             | Match         |
| P-51 | P-51-O1E | IL7R   | cn amp                           | cn amp                       | Match         |
| P-51 | P-51-O1E | KMT2D  | p.T4602fs                        | frameshift variant           | Match         |
| P-51 | P-51-O1E | LRP1B  | p.R3072I                         | missense variant             | Match         |
| P-51 | P-51-O1E | MYC    | cn amp                           | cn amp                       | LCO only      |
| P-51 | P-51-O1E | NFE2L2 | p.R34Q                           | missense variant             | Match         |
| P-51 | P-51-O1E | PIK3CA | p.E542K                          | missense variant             | Match         |
| P-51 | P-51-O1E | PIK3CA | p.E545Q                          | missense variant             | Match         |
| P-51 | P-51-O1E | PTEN   | p.C211=                          | splice region variant        | Match         |
| P-51 | P-51-O1E | RICTOR | cn amp                           | cn amp                       | Match         |
| P-51 | P-51-O1E | SPTA1  | p.E813K                          | missense variant             | Match         |
| P-51 | P-51-O1E | TET2   | c.3410-1G>C                      | splice acceptor variant      | Match         |
| P-51 | P-51-O1E | TP53   | p.Q331H                          | splice region variant        | Match         |
| P-51 | P-51-O1E | WT1    | cn amp                           | cn amp                       | LCO only      |
| P-51 | P-51-O1E | XRCC2  | p.A16S                           | missense variant             | Match         |
| P-51 | P-51-O1E | ZBTB2  | p.R189G                          | missense variant             | Match         |
| P-56 | P-56-O1E | ERBB2  | p.G778 P780dup                   | disruptive inframe insertion | Match         |
| P-56 | P-56-O1E | PIK3CG | p.E556G                          | missense variant             | effusion only |
| P-56 | P-56-O1E | RB1    | exon18-23cn del                  | large genomic rearrangemen   | effusion only |
| P-56 | P-56-O1E | TP53   | c.673-2A>T                       | splice acceptor variant      | Match         |
| P-59 | P-59-O1E | EGFR   | p.L858R                          | missense variant             | Match         |
| P-59 | P-59-O1E | EGFR   | p.T790M                          | missense variant             | Match         |
| P-59 | P-59-O1E | TP53   | p.Y234D                          | missense variant             | Match         |
| P-59 | P-59-O1E | U2AF1  | p.S19L                           | missense variant             | Match         |
| P-60 | P-60-O4E | EGFR   | p.L858R                          | missense variant             | Match         |
| P-60 | P-60-O4E | FANCA  | p.M569 E570delinsIG              | missense variant             | effusion only |
| P-60 | P-60-O4E | SLX4   | c.5153+1G>A                      | splice donor variant         | effusion only |
| P-60 | P-60-O4E | TP53   | p.S215R                          | missense variant             | Match         |
| P-61 | P-61-O5E | EGFR   | p.E746 A750del                   | conservative inframe deletio | Match         |
| P-61 | P-61-O5E | EGFR   | p.T790M                          | missense variant             | Match         |
| P-61 | P-61-O5E | KRAS   | cn del                           | cn del                       | effusion only |
| P-61 | P-61-O5E | RET    | CCDC6-RET                        | gene fusion                  | Match         |
| P-61 | P-61-O5E | SMAD4  | cn del                           | cn del                       | effusion only |
| P-61 | P-61-O5E | SMAD4  | p.D537H                          | missense variant             | Match         |
| P-61 | P-61-O5E | TP53   | p.R282W                          | missense variant             | Match         |
| P-77 | P-77-O1E | ALK    | p.Q897L                          | missense variant             | LCO only      |
| P-77 | P-77-O1E | ALK    | p.T901A                          | missense variant             | LCO only      |
| P-77 | P-77-O1E | ARID1A | p.A226P                          | missense variant             | LCO only      |
| P-77 | P-77-O1E | ARID1A | p.G1351S                         | missense variant             | LCO only      |
| P-77 | P-77-O1E | ARID1A | p.S949P                          | missense variant             | LCO only      |
| P-77 | P-77-O1E | CARD11 | cn amp                           | cn amp                       | effusion only |
| P-77 | P-77-O1E | CTNNB1 | p.S37C                           | missense variant             | effusion only |
| P-77 | P-77-O1E | DNMT3A | c.2322+7_2322+12delinsACC<br>GAG | splice_region_variant        | LCO only      |
| P-77 | P-77-O1E | EGFR   | cn amp                           | cn amp                       | effusion only |
| P-77 | P-77-O1E | EGFR   | p.L858R                          | missense variant             | Match         |
| P-77 | P-77-O1E | EGFR   | p.T790M                          | missense variant             | Match         |
| P-77 | P-77-O1E | ERCC2  | p.R26L                           | missense variant             | LCO only      |
| P-77 | P-77-O1E | EWSR1  | p.M330L                          | missense variant             | LCO only      |
| P-77 | P-77-O1E | FLT4   | p.G513E                          | missense variant             | Match         |
| P-77 | P-77-O1E | GID4   | p.A98 A99delinsTT                | missense variant             | LCO only      |

|      |          |         |                                     |                                |               |
|------|----------|---------|-------------------------------------|--------------------------------|---------------|
| P-77 | P-77-O1E | IKZF1   | cn amp                              | cn amp                         | effusion only |
| P-77 | P-77-O1E | KDR     | p.C1045*                            | stop gained                    | Match         |
| P-77 | P-77-O1E | KMT2A   | p.N3494D                            | missense variant               | effusion only |
| P-77 | P-77-O1E | KMT2D   | c.13840-17_13840-4delinsACCCCACCCCC | splice_region_variant          | LCO only      |
| P-77 | P-77-O1E | LRP1B   | p.D1946V                            | missense variant               | effusion only |
| P-77 | P-77-O1E | MED12   | p.P1946S                            | missense variant               | LCO only      |
| P-77 | P-77-O1E | MED12   | p.S63N                              | missense variant               | LCO only      |
| P-77 | P-77-O1E | PPP2R1A | p.E393Q                             | missense variant               | Match         |
| P-77 | P-77-O1E | PPP2R2A | exon2del                            | large genomic rearrangement    | LCO only      |
| P-77 | P-77-O1E | PPP2R2A | exon4-5del                          | large genomic rearrangement    | LCO only      |
| P-77 | P-77-O1E | RB1     | c.1128-1G>A                         | splice acceptor variant        | Match         |
| P-77 | P-77-O1E | RBM10   | exon6del                            | large genomic rearrangement    | LCO only      |
| P-77 | P-77-O1E | RUNX1   | p.A63G                              | missense variant               | LCO only      |
| P-77 | P-77-O1E | SOX17   | p.L148M                             | missense variant               | LCO only      |
| P-77 | P-77-O1E | TMPRSS2 | p.N314G                             | missense variant               | LCO only      |
| P-77 | P-77-O1E | TP53    | p.E198*                             | stop gained                    | Match         |
| P-77 | P-77-O1E | VEGFA   | p.H161R                             | missense variant               | LCO only      |
| P-77 | P-77-O1E | ZNF703  | p.S20delinsGGSSSG                   | conservative_inframe_insertion | LCO only      |
| P-78 | P-78-O1E | EGFR    | p.L858R                             | missense variant               | Match         |
| P-78 | P-78-O1E | NKX2-1  | cn amp                              | cn amp                         | Match         |
| P-78 | P-78-O1E | TP53    | p.S241Y                             | missense variant               | Match         |
| P-28 | P-28-O1E | ARID1A  | p.P1018L                            | missense variant               | effusion only |
| P-28 | P-28-O1E | MSH6    | p.E1324K                            | missense variant               | effusion only |
| P-28 | P-28-O1E | ROS1    | CD74-ROS1                           | gene fusion                    | Match         |
| P-87 | P-87-O2E | EGFR    | p.L858R                             | missense variant               | Match         |
| P-87 | P-87-O2E | IL7R    | cn amp                              | cn amp                         | effusion only |
| P-87 | P-87-O2E | KMT2D   | p.A230T                             | missense variant               | Match         |
| P-87 | P-87-O2E | PTEN    | exon3-5del                          | large genomic rearrangement    | effusion only |
| P-87 | P-87-O2E | RB1     | CD59-RB1                            | gene fusion                    | Match         |
| P-87 | P-87-O2E | RB1     | RB1-CD59                            | gene fusion                    | Match         |
| P-87 | P-87-O2E | RICTOR  | cn amp                              | cn amp                         | effusion only |
| P-87 | P-87-O2E | RPA1    | SMG6-RPA1                           | gene fusion                    | effusion only |
| P-87 | P-87-O2E | SDHA    | cn amp                              | cn amp                         | effusion only |
| P-87 | P-87-O2E | TERT    | cn amp                              | cn amp                         | effusion only |
| P-87 | P-87-O2E | TET1    | p.K585N                             | missense variant               | Match         |
| P-87 | P-87-O2E | TP53    | p.R110L                             | missense variant               | effusion only |
| P-96 | P-96-O2E | EGFR    | cn amp                              | cn amp                         | effusion only |
| P-96 | P-96-O2E | EGFR    | p.E746 A750del                      | conservative inframe deletion  | Match         |
| P-96 | P-96-O2E | PTEN    | p.G129R                             | missense variant               | Match         |
| P-96 | P-96-O2E | RB1     | p.I723fs                            | frameshift variant             | Match         |
| P-96 | P-96-O2E | TP53    | p.L194P                             | missense variant               | Match         |
| P-97 | P-97-O1E | ASXL1   | cn amp                              | cn amp                         | effusion only |
| P-97 | P-97-O1E | CREBBP  | p.A619T                             | missense variant               | Match         |
| P-97 | P-97-O1E | EGFR    | p.L858R                             | missense variant               | Match         |
| P-97 | P-97-O1E | EGFR    | p.T790M                             | missense variant               | Match         |
| P-97 | P-97-O1E | HIST1H3 | p.K28R                              | missense variant               | Match         |
| P-97 | P-97-O1E | KRAS    | cn amp                              | cn amp                         | effusion only |
| P-97 | P-97-O1E | SRC     | cn amp                              | cn amp                         | effusion only |
| P-97 | P-97-O1E | TP53    | p.N239S                             | missense variant               | Match         |
| P-30 | P-30-O2E | EGFR    | p.E746 A750del                      | inframe deletion               | Match         |
| P-30 | P-30-O2E | EGFR    | p.T790M                             | missense variant               | Match         |
| P-30 | P-30-O2E | FGFR3   | p.R112W                             | missense variant               | effusion only |
| P-30 | P-30-O2E | GATA4   | p.V48M                              | missense variant               | Match         |
| P-30 | P-30-O2E | MTOR    | p.R1749*                            | stop gained                    | Match         |
| P-30 | P-30-O2E | RB1     | cn del                              | cn del                         | effusion only |
| P-30 | P-30-O2E | RET     | RABEP2-RET                          | gene fusion                    | Match         |
| P-30 | P-30-O2E | TERT    | p.A68T                              | missense variant               | effusion only |
| P-30 | P-30-O2E | TP53    | p.A276G                             | missense variant               | Match         |
| P-30 | P-30-O3E | EGFR    | p.E746 A750del                      | inframe deletion               | Match         |



|      |          |        |                      |                             |               |
|------|----------|--------|----------------------|-----------------------------|---------------|
| P-30 | P-30-O3E | EGFR   | p.T790M              | missense variant            | Match         |
| P-30 | P-30-O3E | GATA4  | p.V48M               | missense variant            | Match         |
| P-30 | P-30-O3E | MTOR   | p.R1749*             | stop gained                 | Match         |
| P-30 | P-30-O3E | NTRK1  | FAM118A-NTRK1        | gene fusion                 | Match         |
| P-30 | P-30-O3E | RET    | RABEP2-RET           | gene fusion                 | Match         |
| P-30 | P-30-O3E | TP53   | p.A276G              | missense variant            | Match         |
| P-36 | P-36-O1E | EGFR   | p.D770 N771insG      | inframe insertion           | Match         |
| P-36 | P-36-O1E | TP53   | p.Y220D              | missense variant            | Match         |
| P-41 | P-41-O1E | ATRX   | p.S1174C             | missense variant            | effusion only |
| P-41 | P-41-O1E | BCL6   | p.R668C              | missense variant            | effusion only |
| P-41 | P-41-O1E | EGFR   | cn amp               | cn amp                      | Match         |
| P-41 | P-41-O1E | EGFR   | p.E746 A750del       | disruptive inframe deletion | Match         |
| P-41 | P-41-O1E | EGFR   | p.T790M              | missense variant            | Match         |
| P-41 | P-41-O1E | FOXA1  | cn amp               | cn amp                      | effusion only |
| P-41 | P-41-O1E | NFKBIA | cn amp               | cn amp                      | effusion only |
| P-41 | P-41-O1E | NKX2-1 | cn amp               | cn amp                      | effusion only |
| P-41 | P-41-O1E | RICTOR | p.V165M              | missense variant            | effusion only |
| P-41 | P-41-O1E | TP53   | p.V157F              | missense variant            | Match         |
| P-43 | P-43-O1E | BRCA1  | p.L1800fs            | frameshift variant          | Match         |
| P-43 | P-43-O1E | EGFR   | p.E746 A750del       | disruptive inframe deletion | Match         |
| P-43 | P-43-O1E | EGFR   | p.T790M              | missense variant            | Match         |
| P-43 | P-43-O1E | FANCM  | p.S14L               | missense variant            | Match         |
| P-43 | P-43-O1E | FOXA1  | cn amp               | cn amp                      | LCO only      |
| P-43 | P-43-O1E | NFKBIA | cn amp               | cn amp                      | LCO only      |
| P-43 | P-43-O1E | NKX2-1 | cn amp               | cn amp                      | LCO only      |
| P-43 | P-43-O1E | PPM1D  | PPM1D-SPECC1         | gene fusion                 | effusion only |
| P-43 | P-43-O1E | RB1    | exon18-23del         | large genomic rearrangemen  | LCO only      |
| P-43 | P-43-O1E | TP53   | p.R175H              | missense variant            | Match         |
| P-44 | P-44-O1E | CDK4   | cn amp               | cn amp                      | Match         |
| P-44 | P-44-O1E | CDK6   | p.G157E              | missense variant            | Match         |
| P-44 | P-44-O1E | EGFR   | cn amp               | cn amp                      | Match         |
| P-44 | P-44-O1E | EGFR   | p.E746 A750del       | disruptive inframe deletion | Match         |
| P-44 | P-44-O1E | EGFR   | p.T790M              | missense variant            | Match         |
| P-44 | P-44-O1E | MDM2   | cn amp               | cn amp                      | Match         |
| P-44 | P-44-O1E | RBM10  | p.E112*              | stop gained                 | Match         |
| P-44 | P-44-O1E | SPTA1  | p.W173C              | missense variant            | effusion only |
| P-45 | P-45-O1E | CCNE1  | cn amp               | cn amp                      | LCO only      |
| P-45 | P-45-O1E | CD274  | cn amp               | cn amp                      | LCO only      |
| P-45 | P-45-O1E | PDCD1L | cn amp               | cn amp                      | LCO only      |
| P-45 | P-45-O1E | TERT   | cn amp               | cn amp                      | LCO only      |
| P-45 | P-45-O1E | TP53   | p.V218E              | missense variant            | effusion only |
| P-45 | P-45-O1E | TP53   | TP53-IGR (downstream | large genomic rearrangemen  | effusion only |
| P-45 | P-45-O1E | TSC1   | p.L72V               | missense variant            | LCO only      |
| P-45 | P-45-O1E | WRN    | p.S1256*             | stop gained                 | Match         |
| P-45 | P-45-O1E | NF1    | p.D801H              | missense variant            | Match         |
| P-45 | P-45-O1E | FBXW7  | p.S180C              | missense variant            | effusion only |
| P-45 | P-45-O1E | EGFR   | p.L858R              | missense variant            | Match         |
| P-45 | P-45-O1E | MYCN   | p.K304E              | missense variant            | Match         |
| P-45 | P-45-O1E | EWSR1  | p.D412N              | missense variant            | Match         |
| P-45 | P-45-O1E | FANCG  | cn amp               | cn amp                      | LCO only      |
| P-45 | P-45-O1E | INPP4B | cn amp               | cn amp                      | LCO only      |
| P-45 | P-45-O1E | LYN    | cn amp               | cn amp                      | LCO only      |
| P-45 | P-45-O1E | MET    | cn amp               | cn amp                      | LCO only      |
| P-45 | P-45-O1E | NBN    | cn amp               | cn amp                      | LCO only      |
| P-45 | P-45-O1E | PAX5   | cn amp               | cn amp                      | LCO only      |
| P-45 | P-45-O1E | POLE   | p.F699fs             | frameshift variant          | LCO only      |

**Table S6. Clinical characteristics and drug susceptibility results in four groups. Related to Figure 3 and S3.**

| Case                        | Organoid ID | Gender | Age | ECOG PS score | Stage | Pathology | Site of sampling           | Driver mutation detected by routine genetic testing or FISH | Treatment Lines | LCO-DST regimen used as next-line treatment in the patient | IC <sub>50</sub> (μM) | Clinical Response | Consistency | Other LCO-DST regimen NOT used in the patient (regimen, IC <sub>50</sub> )                                                    |
|-----------------------------|-------------|--------|-----|---------------|-------|-----------|----------------------------|-------------------------------------------------------------|-----------------|------------------------------------------------------------|-----------------------|-------------------|-------------|-------------------------------------------------------------------------------------------------------------------------------|
| <b>Osimertinib group</b>    |             |        |     |               |       |           |                            |                                                             |                 |                                                            |                       |                   |             |                                                                                                                               |
| P-17                        | P-17-O2E    | F      | 41  | 1             | IVB   | ADC       | Pleural effusion           | EGFR 19 del                                                 | 2               | Osimertinib                                                | 1.77                  | PD                | NO          | PC, 22.95                                                                                                                     |
| P-18                        | P-18-O1T    | M      | 80  | 3             | IVB   | ADC       | Supraclavicular lymph node | EGFR L858R;T790M                                            | 2               | Osimertinib                                                | 7.73                  | PD                | YES         | Larotrectinib, 1479<br>Alectinib, 10.18;<br>Cabozantinib, 15.09;                                                              |
| P-30                        | P-30-O2E    | M      | 50  | 2             | IVB   | ADC       | Ascitic effusion           | EGFR 19 del;T790M;<br>RET fusion                            | 4               | Osimertinib                                                | 3.46                  | PD                | YES         | Osimertinib + Cabozantinib,<br>0.75;<br>Alectinib, 13.62;<br>Cabozantinib, 48.85;                                             |
| P-30                        | P-30-O3E    | M      | 50  | 2             | IVB   | ADC       | Pleural effusion           | EGFR 19 del; T790M;<br>FAM118A-NTRK1<br>fusion; RET fusion  | 4               | Osimertinib                                                | 5.59                  | PD                | YES         | Osimertinib + Cabozantinib,<br>2.19;<br>Osimertinib + CBL0137, 0.20;                                                          |
| P-32                        | P-32-O1T    | F      | 69  | 1             | IIIB  | ADC       | Lymph node                 | EGFR L858R;T790M                                            | 1               | Osimertinib                                                | 0.12                  | PR                | YES         | Osimertinib + Cetuximab, 0.51;<br>Osimertinib + PC. 1.21<br>Afatinib, 0.01;                                                   |
| P-34                        | P-34-O1E    | M      | 41  | 2             | IVB   | ADC       | Pleural effusion           | EGFR L858R                                                  | 1               | Osimertinib                                                | 1.9                   | PR                | YES         | Osimertinib + CBL0137, 0.62;<br>Osimertinib + Cetuximab. 2.52<br>Afatinib, 0.33;                                              |
| P-41                        | P-41-O1E    | F      | 59  | 1             | IVA   | ADC       | Pleural effusion           | EGFR 19 del;T790M                                           | 2               | Osimertinib                                                | 0.1                   | PR                | YES         | Dacomitinib, 0.61;<br>PLB1004, 1.41;<br>PC 23.20                                                                              |
| P-59                        | P-59-O1E    | F      | 50  | 3             | IVB   | ADC       | Ascitic effusion           | EGFR L858R;T790M                                            | 4               | Osimertinib                                                | 4.37                  | PD                | YES         | Gefitinib, 6.59                                                                                                               |
| P-59                        | P-59-O5E    | F      | 50  | 3             | IVB   | ADC       | Pleural effusion           | EGFR L858R;T790M                                            | 4               | Osimertinib                                                | 15.5                  | PD                | YES         | Gefitinib, 16.69;<br>Osimertinib + GDC-0941, 3.42                                                                             |
| P-70                        | P-70-O1E    | M      | 54  | 3             | IVB   | ADC       | Pleural effusion           | EGFR L858R                                                  | 2               | Osimertinib                                                | 2.68                  | PD                | YES         | Afatinib, 7.98                                                                                                                |
| P-77                        | P-77-O2E    | F      | 70  | 1             | IVA   | ADC       | Pleural effusion           | EGFR L858R;T790M                                            | 2               | Osimertinib                                                | 2.14                  | PR                | YES         | Afatinib, 2.36                                                                                                                |
| P-78                        | P-78-O2E    | F      | 50  | 1             | IVB   | ADC       | Pleural effusion           | EGFR L858R                                                  | 1               | Osimertinib                                                | 1.23                  | PR                | YES         | NA                                                                                                                            |
| P-89                        | P-89-O2E    | M      | 28  | 1             | IVB   | ADC       | Pleural effusion           | EGFR 19 del                                                 | 1               | Osimertinib                                                | 0.33                  | PR                | YES         | NA                                                                                                                            |
| P-90                        | P-90-O1E    | F      | 58  | 4             | IVB   | SCC       | Pleural effusion           | EGFR 19 del                                                 | 2               | Osimertinib                                                | 1.96                  | PD                | NO          | Afatinib, 0.30                                                                                                                |
| P-90                        | P-90-O2E    | F      | 58  | 4             | IVB   | SCC       | Pleural effusion           | EGFR 19 del                                                 | 2               | Osimertinib                                                | 2.43                  | PD                | YES         | Afatinib, 0.04                                                                                                                |
| <b>Other targeted group</b> |             |        |     |               |       |           |                            |                                                             |                 |                                                            |                       |                   |             |                                                                                                                               |
| P-27                        | P-27-O1E    | M      | 55  | 3             | IVB   | ADC       | Pericardial effusion       | EML4-ALK fusion                                             | 3               | Crizotinib                                                 | 1.47                  | PD                | YES         | Lorlatinib, 12.38;<br>Alectinib, 17.65;<br>Crizotinib + Alectinib, 1.25;<br>Crizotinib + Lorlatinib 1.59<br>Crizotinib, 4.30; |
| P-33                        | P-33-O1E    | F      | 54  | 1             | IVA   | ADC       | Pleural effusion           | EML4-ALK fusion,<br>ALK-C17orf75 fusion                     | 1               | Alectinib                                                  | 0.59                  | PR                | YES         | Lorlatinib, 26.88;<br>Alectinib + CBL0137. 0.59<br>Crizotinib, 1.32;                                                          |
| P-33                        | P-33-O2T    | F      | 54  | 1             | IVA   | ADC       | Supraclavicular lymph node | EML4-ALK fusion                                             | 1               | Alectinib                                                  | 0.31                  | PR                | YES         | Lorlatinib, 7.12;<br>Alectinib + CBL0137. 0.31<br>Osimertinib + Gefitinib, 2.65;                                              |
| P-38                        | P-38-O1T    | M      | 52  | 1             | IVB   | ADC       | Supraclavicular lymph node | EGFR L858R                                                  | 2               | Osimertinib +<br>Radiotherapy                              | 1.04                  | PD                | YES         | Osimertinib + PC, 5.91;<br>EP, 10.76;<br>PC 11.74                                                                             |
| P-43                        | P-43-O1E    | F      | 49  | 1             | IVA   | ADC       | Pleural effusion           | EGFR 19 del;T790M                                           | 2               | AZD9291 generic drug                                       | 1.22                  | PD                | YES         | Docetaxel, 6.265E+150                                                                                                         |
| P-49                        | P-49-O1E    | M      | 70  | 3             | IVB   | ADC       | Pleural effusion           | Negative                                                    | 3               | Lorlatinib                                                 | 13.01                 | PD                | YES         | NA                                                                                                                            |
| P-63                        | P-63-O3E    | F      | 38  | 1             | IVB   | ADC       | Pleural effusion           | EML4-ALK fusion,<br>ALK F1174C mutation                     | 3               | Alectinib                                                  | 5.12                  | PD                | YES         | SAF-189s, 2.08;<br>Lorlatinib, 16.54                                                                                          |
| P-75                        | P-75-O1E    | M      | 58  | 1             | IVB   | ADC       | Pleural effusion           | ERBB2 20ins                                                 | 1               | Pyrotinib                                                  | 0.05                  | PR                | YES         | PC, NA                                                                                                                        |
| P-75                        | P-75-O2E    | M      | 58  | 1             | IVB   | ADC       | Pleural effusion           | ERBB2 20ins                                                 | 1               | Pyrotinib                                                  | 0.49                  | PR                | YES         | PC, 18.88                                                                                                                     |

|                                    |           |   |    |   |     |      |                      |                                             |   |                                 |          |    |     |                                                                                 |
|------------------------------------|-----------|---|----|---|-----|------|----------------------|---------------------------------------------|---|---------------------------------|----------|----|-----|---------------------------------------------------------------------------------|
| P-86                               | P-86-O1E  | F | 74 | 1 | IVA | ADC  | Pleural effusion     | MET 14 skipping                             | 1 | Bozitinib                       | 810.6    | SD | YES | Crizotinib, 6.28;<br>Savolitinib, 2.886E+53                                     |
| P-97                               | P-97-O1E  | M | 59 | 1 | IVB | ADC  | Pleural effusion     | EGFR L858R;T790M                            | 2 | PLB1004                         | 2.48     | PR | NO  | Osimertinib, NA;<br>Gefitinib, NA                                               |
| P-97                               | P-97-O2E  | M | 59 | 1 | IVB | ADC  | Pleural effusion     | EGFR L858R;T790M                            | 2 | PLB1004                         | > 1000   | PR | NO  | Large panel DST <sup>§</sup>                                                    |
| P-97                               | P-97-O3E  | M | 59 | 1 | IVB | ADC  | Pleural effusion     | EGFR L858R;T790M                            | 2 | PLB1004                         | 34.29    | PR | NO  | Large panel DST <sup>§</sup>                                                    |
| P-100                              | P-100-O1E | M | 35 | 1 | IVB | ADC  | Pleural effusion     | EGFR L858R;T790M                            | 3 | TQB3804                         | 0.52     | PD | NO  | Large panel DST <sup>§</sup>                                                    |
| P-100                              | P-100-O2E | M | 35 | 1 | IVB | ADC  | Pleural effusion     | ;cis-C797S mutation<br>EGFR L858R;T790M     | 3 | TQB3804                         | 3.79     | PD | YES | Large panel DST <sup>§</sup>                                                    |
| P-102                              | P-102-O1E | F | 52 | 1 | IVB | SCC  | Pleural effusion     | KIF5B-RET fusion                            | 2 | LOXO-292                        | 5.7      | PR | NO  | Nab-paclitaxel + carboplatin, 15.30                                             |
| P-105                              | P-105-O1T | M | 59 | 1 | IVB | SAR  | Muscle mass          | MET 14 skipping                             | 1 | Crizotinib                      | 4.95     | PD | YES | Savolitinib, 52.83                                                              |
| <b>Dual targeted therapy group</b> |           |   |    |   |     |      |                      |                                             |   |                                 |          |    |     |                                                                                 |
| P-60                               | P-60-O1T  | M | 55 | 1 | IVB | ADC  | Lymph node           | EGFR L858R;MET<br>amplification             | 2 | Osimertinib +<br>Savolitinib    | 1.32     | PR | YES | Osimertinib, 1.82                                                               |
| P-60                               | P-60-O2E  | M | 55 | 1 | IVB | ADC  | Pericardial effusion | EGFR L858R;MET<br>amplification             | 2 | Osimertinib +<br>Savolitinib    | 0.71     | PR | YES | Osimertinib, 1.15                                                               |
| P-60                               | P-60-O3E  | M | 55 | 1 | IVB | ADC  | Pericardial effusion | EGFR L858R;MET<br>amplification             | 2 | Osimertinib +<br>Savolitinib    | 0.25     | PR | YES | Osimertinib, 0.25;<br>Savolitinib, 11.59                                        |
| P-60                               | P-60-O4E  | M | 55 | 1 | IVB | ADC  | Pericardial effusion | EGFR L858R;MET<br>amplification             | 2 | Osimertinib +<br>Savolitinib    | 0.24     | PR | YES | Osimertinib, 1.30;<br>Savolitinib, 17.61                                        |
| P-61                               | P-61-O1E  | F | 51 | 3 | IVB | ADC  | Ascitic effusion     | EGFR 19<br>del;T790M,RET fusion             | 4 | Osimertinib +<br>Cabozantinib   | 0.15     | PR | YES | Osimertinib, 3.68;<br>BLU667, 0.76;                                             |
| P-61                               | P-61-O2E  | F | 51 | 3 | IVB | ADC  | Ascitic effusion     | EGFR 19<br>del;T790M,RET fusion             | 4 | Osimertinib +<br>Cabozantinib   | 0.22     | PR | YES | Osimertinib + BLU667, 0.03;<br>PC 19.41<br>Osimertinib, 3.37;                   |
| P-61                               | P-61-O3E  | F | 51 | 3 | IVB | ADC  | Ascitic effusion     | EGFR 19<br>del;T790M,RET fusion             | 4 | Osimertinib +<br>Cabozantinib   | 0.16     | PR | YES | BLU667, 2.09;<br>Osimertinib + BLU667, 0.02;<br>PC 27.10<br>Osimertinib, 5.16;  |
| P-61                               | P-61-O4E  | F | 51 | 3 | IVB | ADC  | Pleural effusion     | EGFR 19<br>del;T790M,RET fusion             | 4 | Osimertinib +<br>Cabozantinib   | 0.33     | PR | YES | BLU667, 0.22;<br>Osimertinib + BLU667, 0.01;<br>PC 21.65<br>Osimertinib, 11.31; |
| P-61                               | P-61-O5E  | F | 51 | 3 | IVB | ADC  | Pleural effusion     | EGFR 19<br>del;T790M,RET fusion             | 4 | Osimertinib +<br>Cabozantinib   | 0.44     | PR | YES | BLU667, 0.23;<br>Osimertinib + BLU667, 0.03;<br>PC 0.65<br>Osimertinib, 3.65;   |
| P-95                               | P-95-O2E  | F | 62 | 1 | IVB | ADC  | Pleural effusion     | BRAF V600E                                  | 1 | Darafenib + Trametinib          | > 1000   | SD | YES | BLU667, 0.51;<br>Osimertinib + BLU667, 0.24;<br>PC 17.12<br>Darafenib, NA       |
| <b>Chemotherapy group</b>          |           |   |    |   |     |      |                      |                                             |   |                                 |          |    |     |                                                                                 |
| P-3                                | P-3-O1E   | M | 50 | 1 | IVB | ADC  | Pericardial effusion | EGFR 19 del                                 | 3 | EP                              | 6.635    | PR | YES | Osimertinib, 0.013;<br>Osimertinib + EP, 0.009;<br>Osimertinib + PC, 0.012;     |
| P-25                               | P-25-O1E  | F | 32 | 1 | IVB | ADC  | Pleural effusion     | CD74-ROS1 fusion,<br>ROS1-intergenic fusion | 3 | PC                              | 89.72    | SD | YES | Afatimib + EP 0.002<br>Ceritinib, 3.37;<br>Lorlatinib, 18.31                    |
| P-50                               | P-50-O1E  | M | 69 | 1 | IVA | SCLC | Pleural effusion     | NA                                          | 1 | EP                              | 37.7     | PD | YES | NA                                                                              |
| P-51                               | P-51-O1E  | M | 63 | 1 | IVB | SCC  | Pleural effusion     | Negative                                    | 1 | Nab-paclitaxel +<br>Carboplatin | 10.91    | PD | YES | GDC-0941, 2.17;<br>Everolimus, 16.46                                            |
| P-51                               | P-51-O2E  | M | 63 | 1 | IVB | SCC  | Pleural effusion     | Negative                                    | 1 | Nab-paclitaxel +<br>Carboplatin | 14.29    | PD | NO  | GDC-0941, 1.90;<br>Everolimus, 14.29                                            |
| P-51                               | P-51-O3E  | M | 63 | 1 | IVB | SCC  | Pleural effusion     | Negative                                    | 1 | Nab-paclitaxel +<br>Carboplatin | 2.05E+18 | PD | NO  | GDC-0941, 2.38;<br>Everolimus, 32.54                                            |

|      |          |   |    |   |      |      |                  |             |   |                |          |    |     |                                                                   |
|------|----------|---|----|---|------|------|------------------|-------------|---|----------------|----------|----|-----|-------------------------------------------------------------------|
| P-65 | P-65-O1E | M | 66 | 1 | IIIC | SCLC | Pleural effusion | NA          | 1 | EP             | 20.9     | PR | YES | NA                                                                |
| P-73 | P-73-O1T | M | 70 | 2 | IVB  | SCLC | Lymph node       | NA          | 1 | Nab-paclitaxel | 5.03E+11 | PD | YES | EP, 33.52                                                         |
| P-81 | P-81-O1E | F | 62 | 2 | IVB  | ADC  | Pleural effusion | EGFR 19 del | 3 | Nab-paclitaxel | 5.10E+15 | PD | YES | Osimertinib, 1.46;<br>Osimertinib + EP, 2.24                      |
| P-83 | P-83-O1E | M | 77 | 1 | IVB  | SCLC | Pleural effusion | NA          | 1 | EC             | 95.89    | SD | YES | NA<br>Osimertinib, 19.34;                                         |
| P-85 | P-85-O1E | F | 32 | 1 | IVB  | ADC  | Ascitic effusion | EGFR 19 del | 4 | TDM1           | 6.88E+37 | PD | YES | Osimertinib + Pyrotinib, 7.74;<br>PC, 36.98                       |
| P-85 | P-85-O2E | F | 32 | 1 | IVB  | ADC  | Ascitic effusion | EGFR 19 del | 4 | TDM1           | 8.28E+33 | PD | YES | Osimertinib, 2.72;<br>Osimertinib + Pyrotinib, 2.04;<br>PC, 53.91 |

Abbreviations: LCO-DS1: Lung cancer organoid based drug sensitivity test; M: male; F: female; SCLC: small cell lung cancer; ADC: adenocarcinoma; SCC: squamous cell carcinoma; SAR: sarcomatoid carcinoma; NA: not available; IC50: half-maximal inhibitory concentration; Driver mutation: EGFR, ALK, HER2, MET, RET, ROS1, BRAF, KRAS; PC: Pemetrexed + Carboplatin; EP: Etoposide + Cisplatin; EC: Etoposide + Carboplatin.
